# Supplementary material for: Caffeic Acid Phosphanium Derivatives: Potential Selective Antitumor, Antimicrobial and Antiprotozoal Agents
Source: MDPI journal article supplement (doi:10.3390/ijms25021200), 2024-01-18
Supplement: s1 [file s1]

## Supporting Information

# Caffeic Acid Phosphanium Derivatives: Potential Selective Antitumor, Antimicrobial and Antiprotozoal Agents

Miloš Lukáč <sup>1</sup>, Livia Slobodníková <sup>2</sup>, Martin Mrva <sup>3</sup>, Aneta Dušeková <sup>3</sup>, Mária Garajová <sup>3</sup>, Martin Kello <sup>4</sup>, Dominika Šebová <sup>4</sup>, Martin Pisárčik <sup>1</sup>, Marián Kojnok <sup>1</sup>, Andrej Vrták <sup>1</sup>, Elena Kurin <sup>5</sup> and Silvia Bittner Fialová <sup>5,\*</sup>

<sup>1</sup> Department of Chemical Theory of Drugs, Faculty of Pharmacy, Comenius University Bratislava, Odbojárov 10, 832 32 Bratislava, Slovakia; lukac@fpharm.uniba.sk (M.L.); pisarcik@fpharm.uniba.sk (M.P.); mariankojнок219@gmail.com (M.K.); andrej1616@gmail.com (A.V.)

<sup>2</sup> Institute of Microbiology, Faculty of Medicine, Comenius University Bratislava, University Hospital in Bratislava, Sasinkova 4, 811 08 Bratislava, Slovakia; livia.slobodnikova@fmed.uniba.sk

<sup>3</sup> Department of Zoology, Faculty of Natural Sciences, Comenius University Bratislava, Mlynská Dolina, Ilkovičova 6, 842 15 Bratislava, Slovakia; martin.mrva@uniba.sk (M.M.); aneta.dusekova@gmail.com (A.D.); maria.garajova@uniba.sk (M.G.)

<sup>4</sup> Department of Pharmacology, Faculty of Medicine, P.J. Šafárik University, Trieda SNP 1, 040 11 Košice, Slovakia; martin.kello@upjs.sk (M.K.); dominika.sebova@student.upjs.sk (D.Š.)

<sup>5</sup> Department of Pharmacognosy and Botany, Faculty of Pharmacy, Comenius University Bratislava, Odbojárov 10, 832 32 Bratislava, Slovakia; elena.kurin@uniba.sk

\* Correspondence: fialova@fpharm.uniba.sk; Tel.: +421-250-117-206

## Table of Contents

|                                                                                                          |    |
|----------------------------------------------------------------------------------------------------------|----|
| Figure S1. Chemical structure of CAP 6 (n = 3), CAP 8 (n = 4), CAP 10 (n = 5), CAP 12 (n = 6).....       | 3  |
| Figure S2. <sup>13</sup> C NMR data of CAP 6 (in CDCl <sub>3</sub> ) .....                               | 4  |
| Figure S3. <sup>1</sup> H NMR data of CAP 6 (in CDCl <sub>3</sub> ) .....                                | 5  |
| Figure S4. <sup>31</sup> P NMR data of CAP 6 (in CDCl <sub>3</sub> ) .....                               | 6  |
| Figure S5. <sup>13</sup> C NMR data of CAP 8 (in CDCl <sub>3</sub> ) .....                               | 7  |
| Figure S6. <sup>1</sup> H NMR data of CAP 8 (in CDCl <sub>3</sub> ) .....                                | 8  |
| Figure S7. <sup>31</sup> P NMR data of CAP 8 (in CDCl <sub>3</sub> ) .....                               | 9  |
| Figure S8. <sup>13</sup> C NMR data of CAP 10 (in CDCl <sub>3</sub> ) .....                              | 10 |
| Figure S9. <sup>1</sup> H NMR data of CAP 10 (in CDCl <sub>3</sub> ) .....                               | 11 |
| Figure S10. <sup>31</sup> P NMR data of CAP 10 (in CDCl <sub>3</sub> ) .....                             | 12 |
| Figure S11. <sup>13</sup> C NMR data of CAP 12 (in CDCl <sub>3</sub> ) .....                             | 13 |
| Figure S12. <sup>1</sup> H NMR data of CAP 12 (in CDCl <sub>3</sub> ) .....                              | 14 |
| Figure S13. <sup>31</sup> P NMR data of CAP 12 (in CDCl <sub>3</sub> ) .....                             | 15 |
| Figure S14. <sup>13</sup> C NMR data of CAP 6 ester (in CDCl <sub>3</sub> ) .....                        | 16 |
| Figure S15. <sup>1</sup> H NMR data of CAP 6 ester (in CDCl <sub>3</sub> ) .....                         | 17 |
| Figure S16. <sup>13</sup> C NMR data of CAP 8 ester (in CDCl <sub>3</sub> ) .....                        | 18 |
| Figure S17. <sup>1</sup> H NMR data of CAP 8 ester (in CDCl <sub>3</sub> ) .....                         | 19 |
| Figure S18. <sup>13</sup> C NMR data of CAP 10 ester (in CDCl <sub>3</sub> ) .....                       | 20 |
| Figure S19. <sup>1</sup> H NMR data of CAP 10 ester (in CDCl <sub>3</sub> ) .....                        | 21 |
| Figure S20. <sup>13</sup> C NMR data of CAP 12 ester (in CDCl <sub>3</sub> ) .....                       | 22 |
| Figure S21. <sup>1</sup> H NMR data of CAP 12 ester (in CDCl <sub>3</sub> ) .....                        | 23 |
| Figure S22. HPLC-DAD data of CAP 6 (60% H <sub>2</sub> O + 0.05% TFA/40% ACN + 0.05% TFA) at λ = 254 nm  | 24 |
| Figure S23. HPLC-DAD data of CAP 8 (60% H <sub>2</sub> O + 0.05% TFA/40% ACN + 0.05% TFA) at λ = 254 nm  | 25 |
| Figure S24. HPLC-DAD data of CAP 10 (60% H <sub>2</sub> O + 0.05% TFA/40% ACN + 0.05% TFA) at λ = 254 nm | 26 |
| Figure S25. HPLC-DAD data of CAP 12 (60% H <sub>2</sub> O + 0.05% TFA/40% ACN + 0.05% TFA) at λ = 254 nm | 27 |

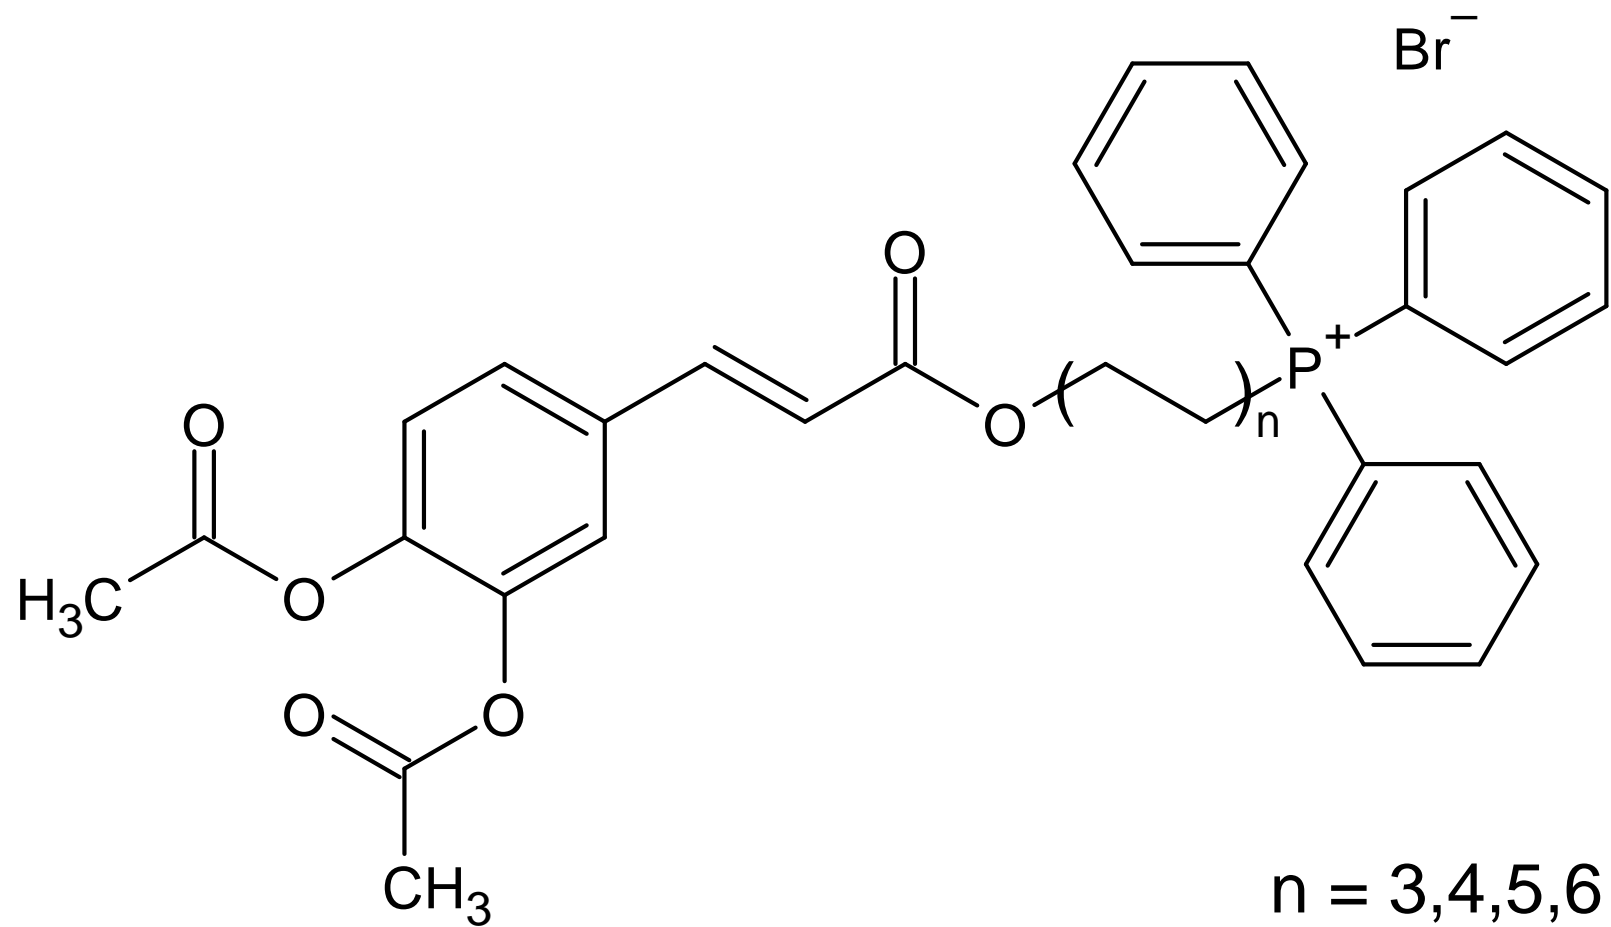

Figure S1. Chemical structure of CAP 6 ( $n = 3$ ), CAP 8 ( $n = 4$ ), CAP 10 ( $n = 5$ ), CAP 12 ( $n = 6$ )

<sup>13</sup>C NMR, 100 MHz, AutoX\_DB  
AVMK-6TPP  
CDCl<sub>3</sub>  
02 Aug 2019

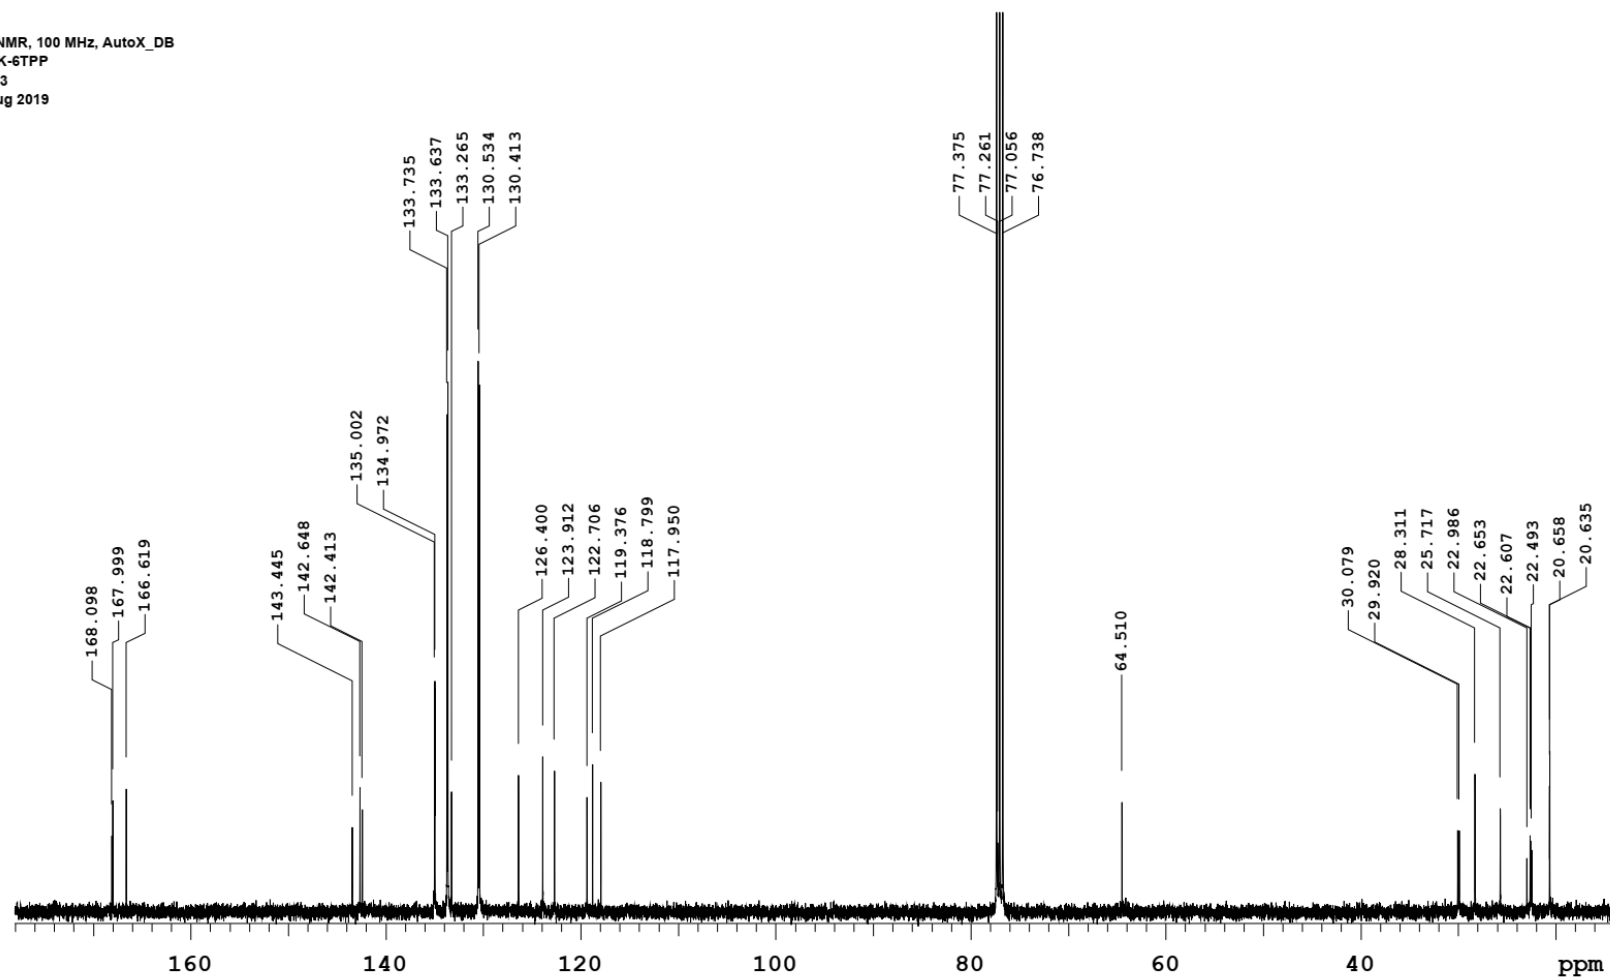

Figure S2. <sup>13</sup>C NMR data of CAP 6 (in CDCl<sub>3</sub>)

1H NMR, 400 MHz, AutoX\_DB  
AVMK-6TPP  
CDCl<sub>3</sub>  
02 Aug 2019

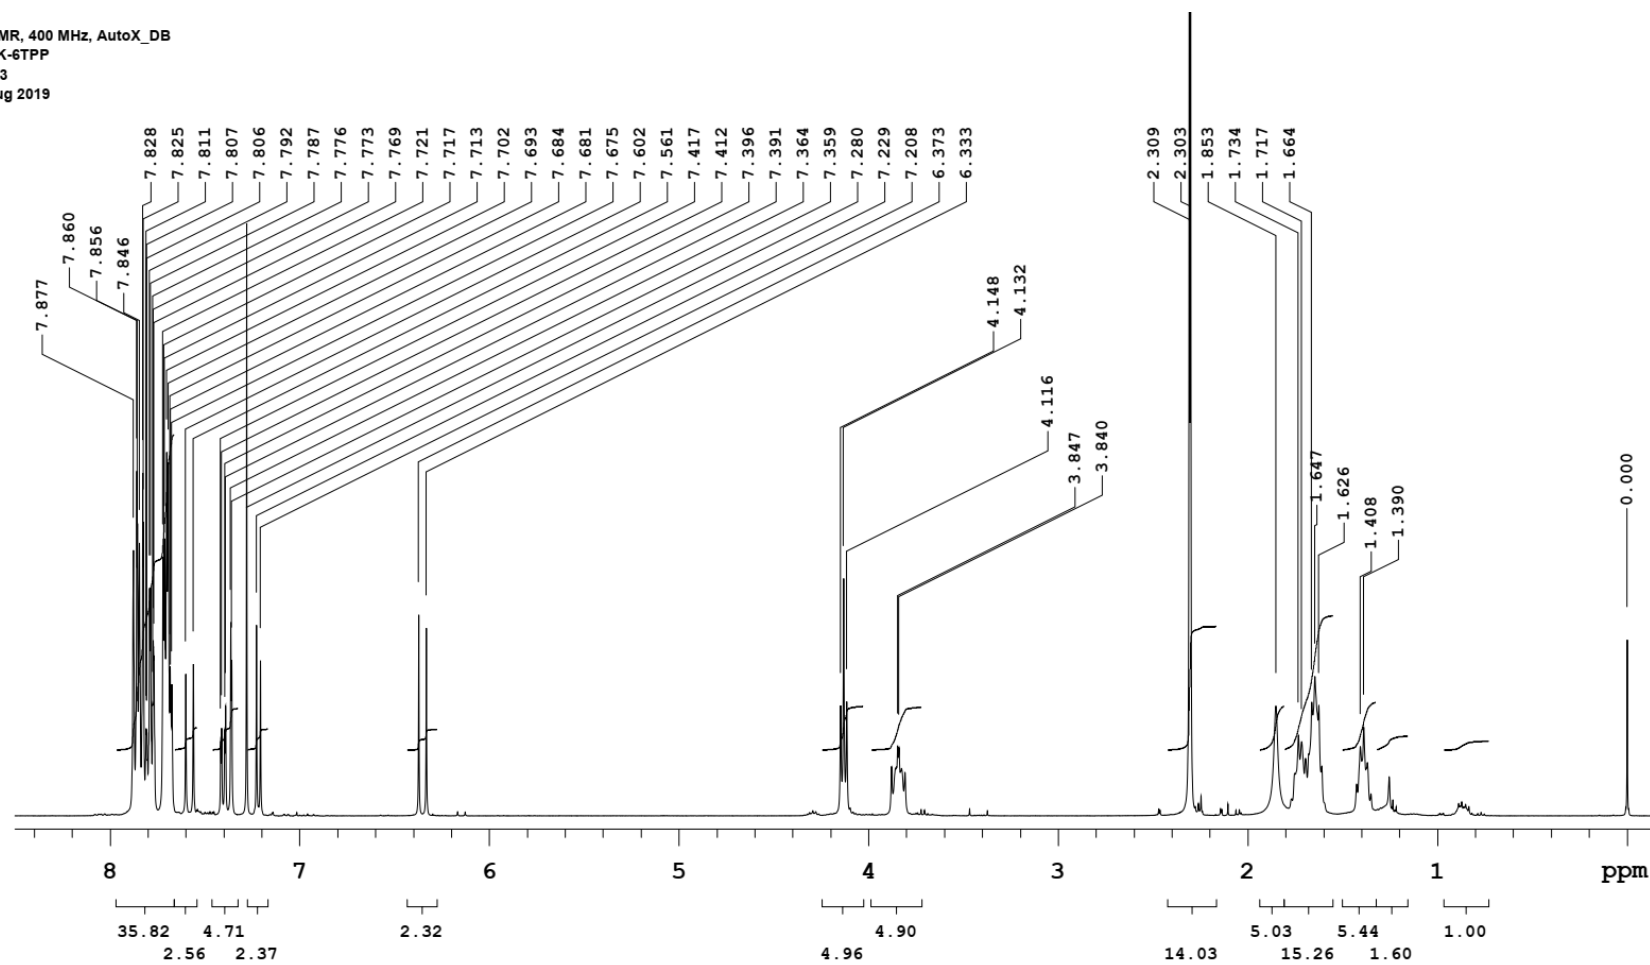

Figure S3. <sup>1</sup>H NMR data of CAP 6 (in CDCl<sub>3</sub>)

31P NMR, 162 MHz, AutoX\_DB  
AVMK-6TPP  
CDCl<sub>3</sub>  
02 Aug 2019

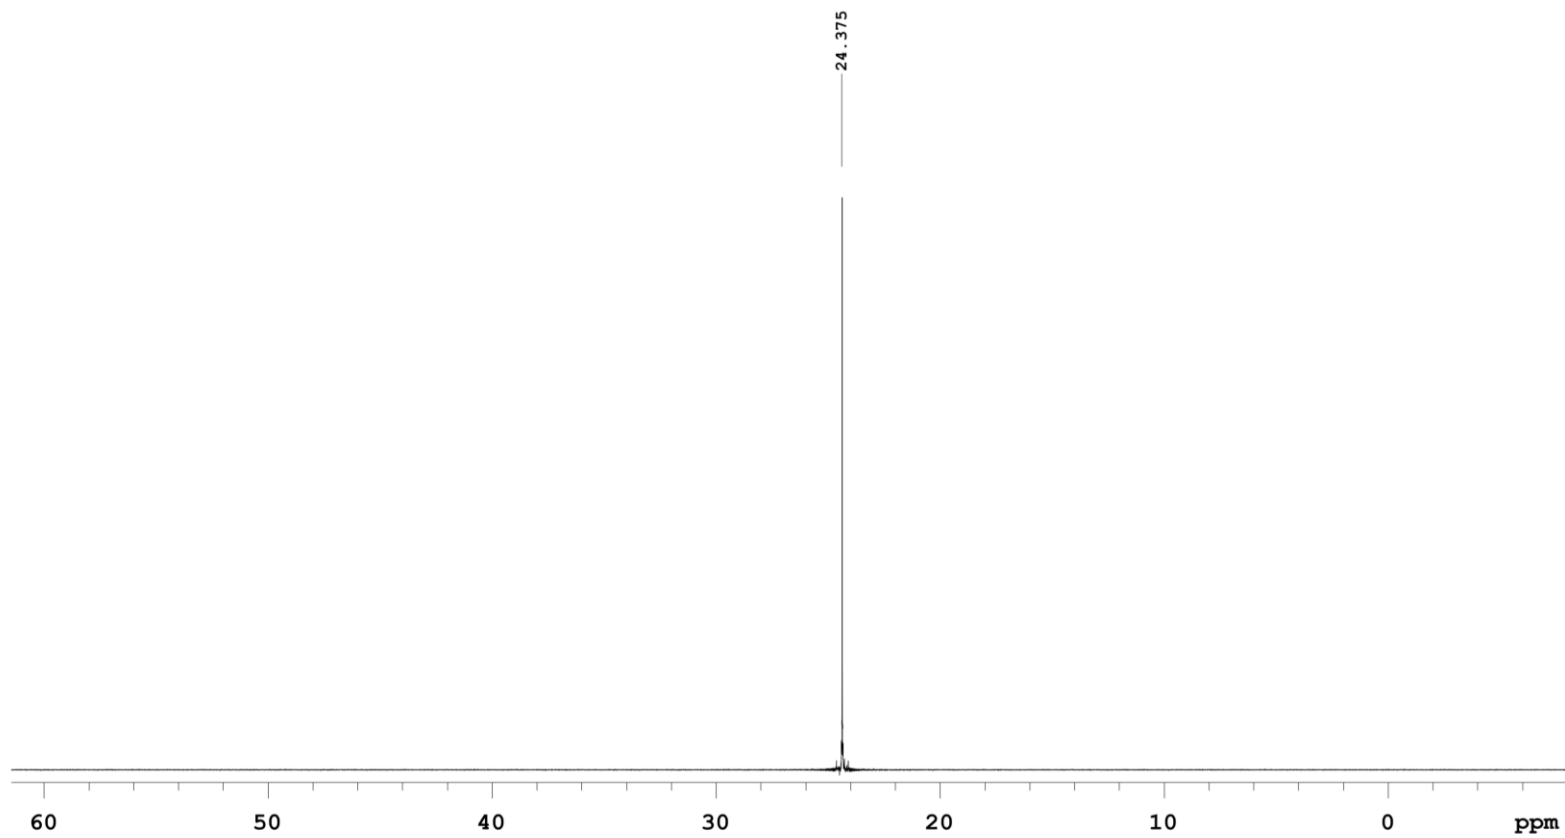

Figure S4. <sup>31</sup>P NMR data of CAP 6 (in CDCl<sub>3</sub>)

<sup>13</sup>C NMR, 75 MHz  
AVMK-8TPP  
CDCl<sub>3</sub>  
20 Jul 2018

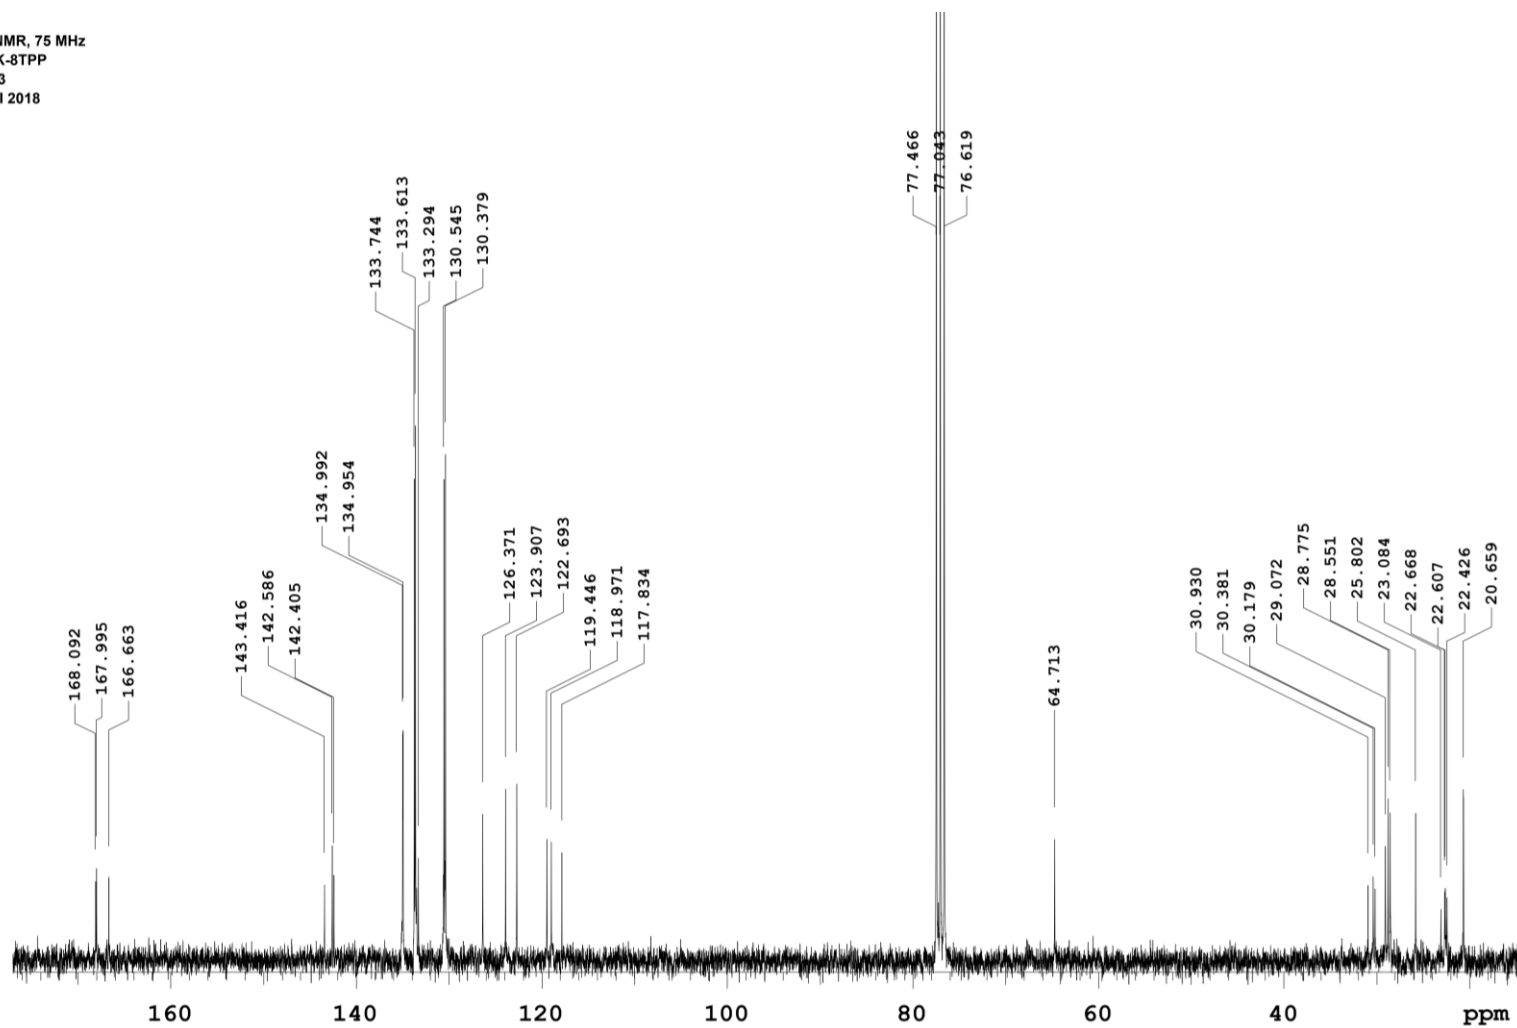

Figure S5. <sup>13</sup>C NMR data of CAP 8 (in CDCl<sub>3</sub>)

<sup>1</sup>H NMR, 300 MHz  
 AVMK-8TPP  
 CDCl<sub>3</sub>  
 20 Jul 2018

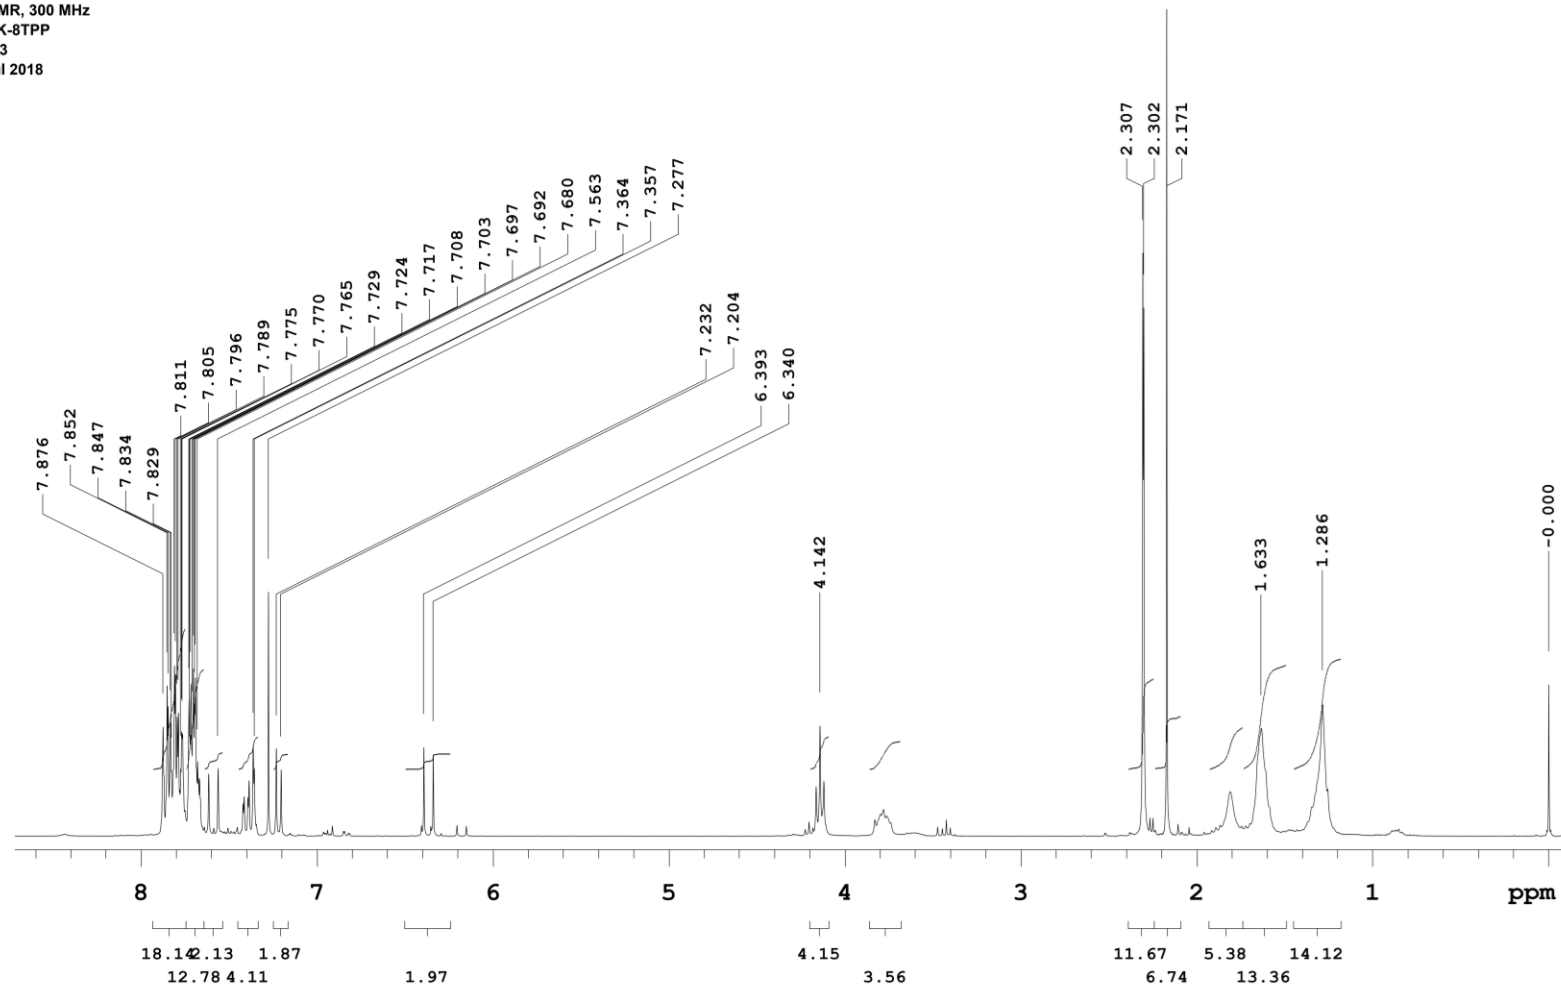

Figure S6. <sup>1</sup>H NMR data of CAP 8 (in CDCl<sub>3</sub>)



31P NMR, 121.47 MHz  
AVMK-8TPP  
CDCl<sub>3</sub>  
20 Jul 2018

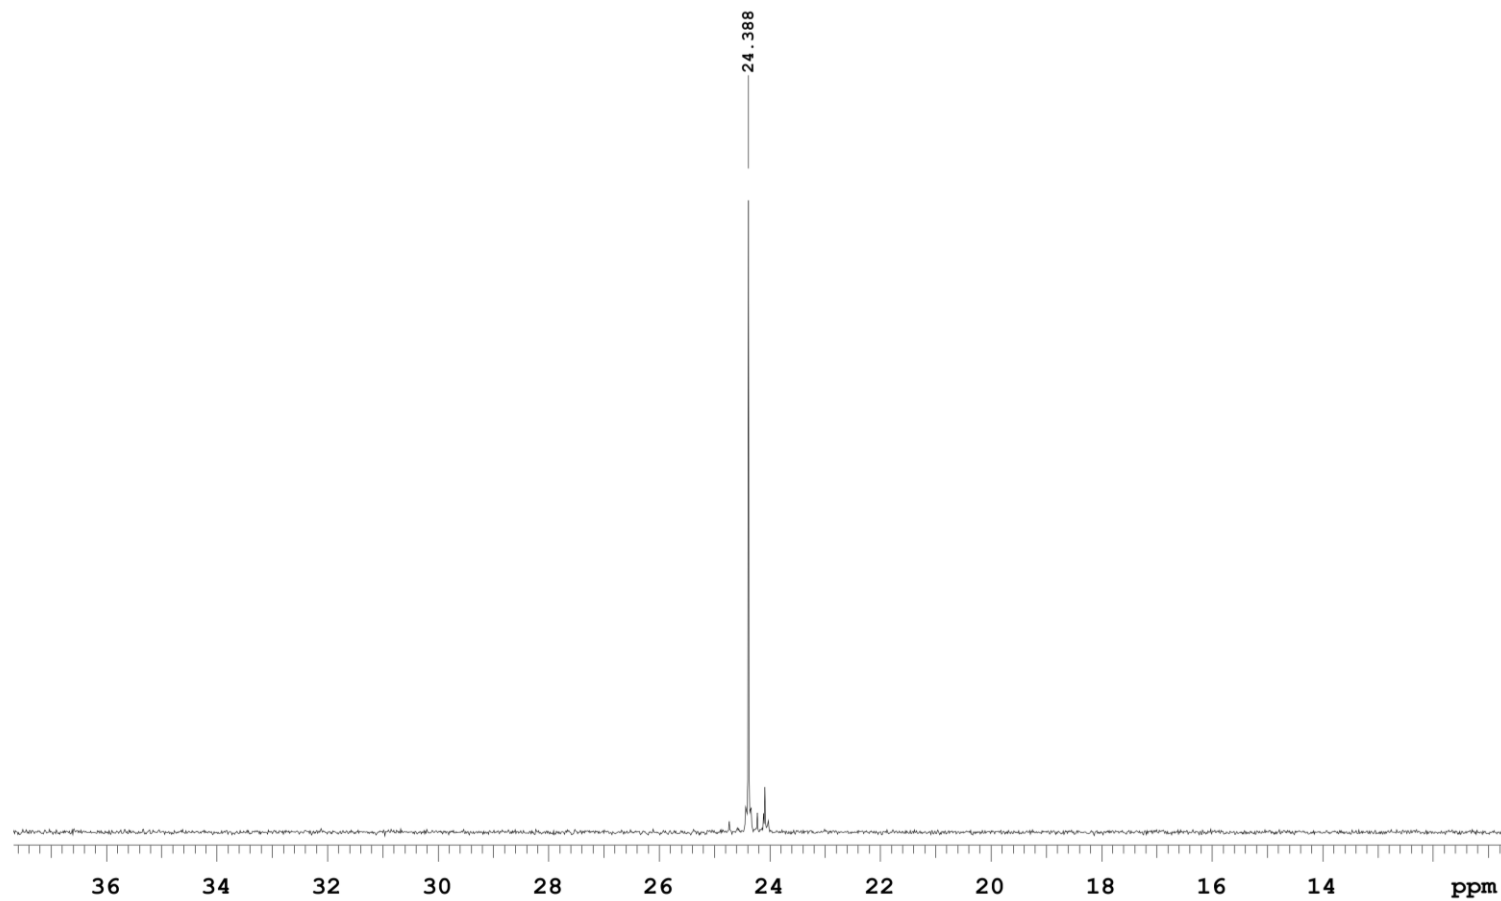

Figure S7. <sup>31</sup>P NMR data of CAP 8 (in CDCl<sub>3</sub>)

<sup>13</sup>C NMR, 75 MHz  
AVMK10P  
CDCl<sub>3</sub>  
25 Jun 2018

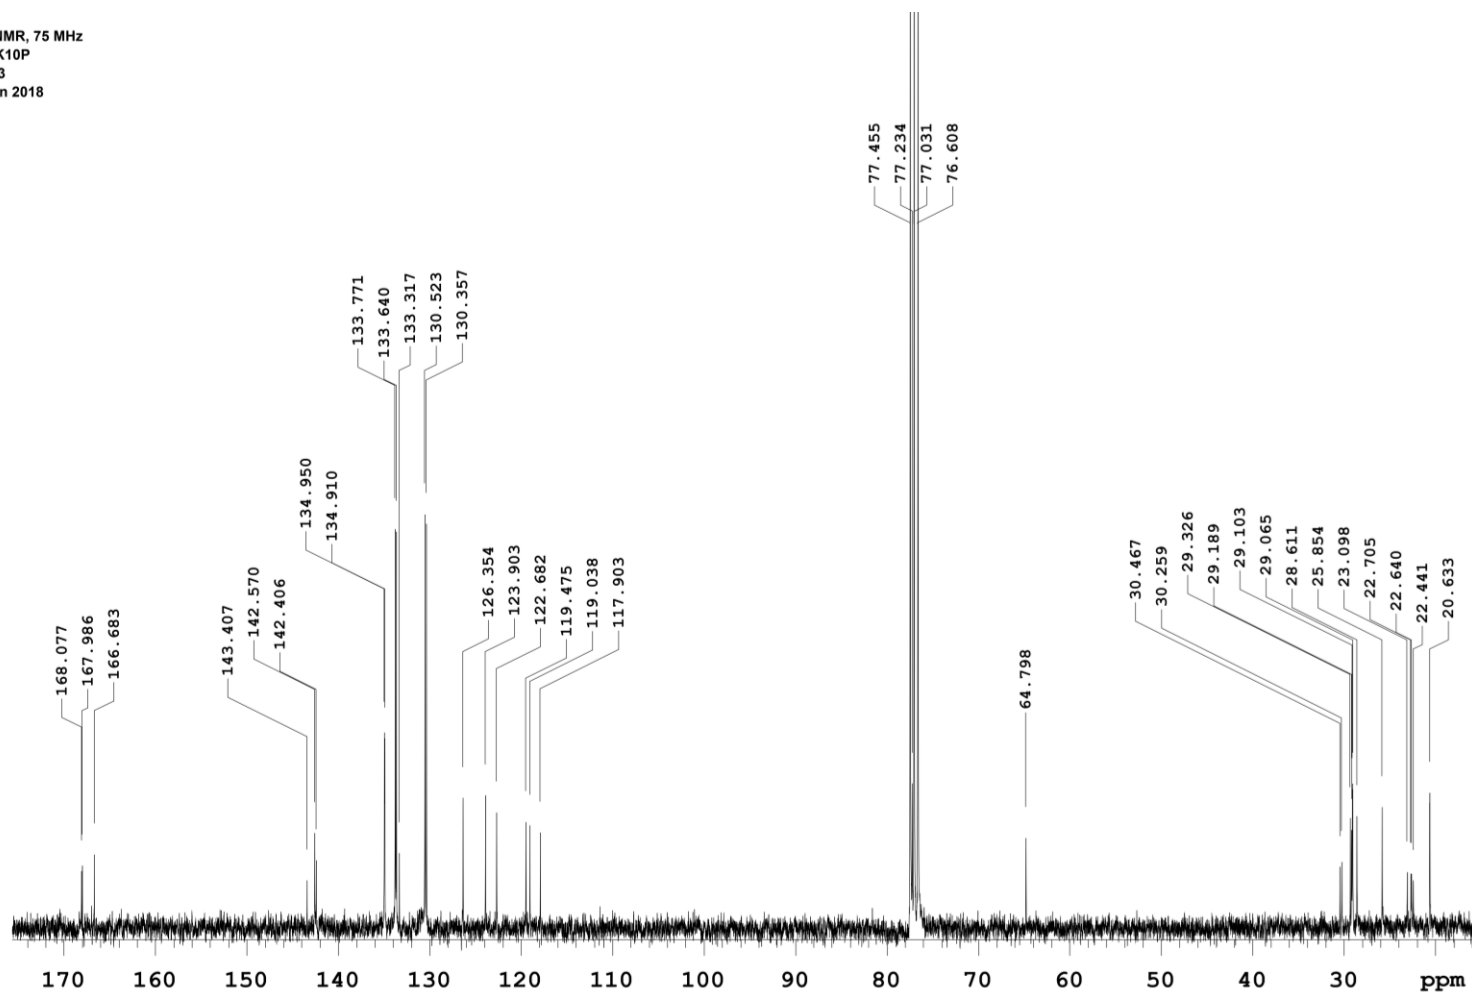

Figure S8. <sup>13</sup>C NMR data of CAP 10 (in CDCl<sub>3</sub>)

<sup>1</sup>H NMR, 300 MHz  
 AVMK10P  
 CDCl<sub>3</sub>  
 25 Jun 2018

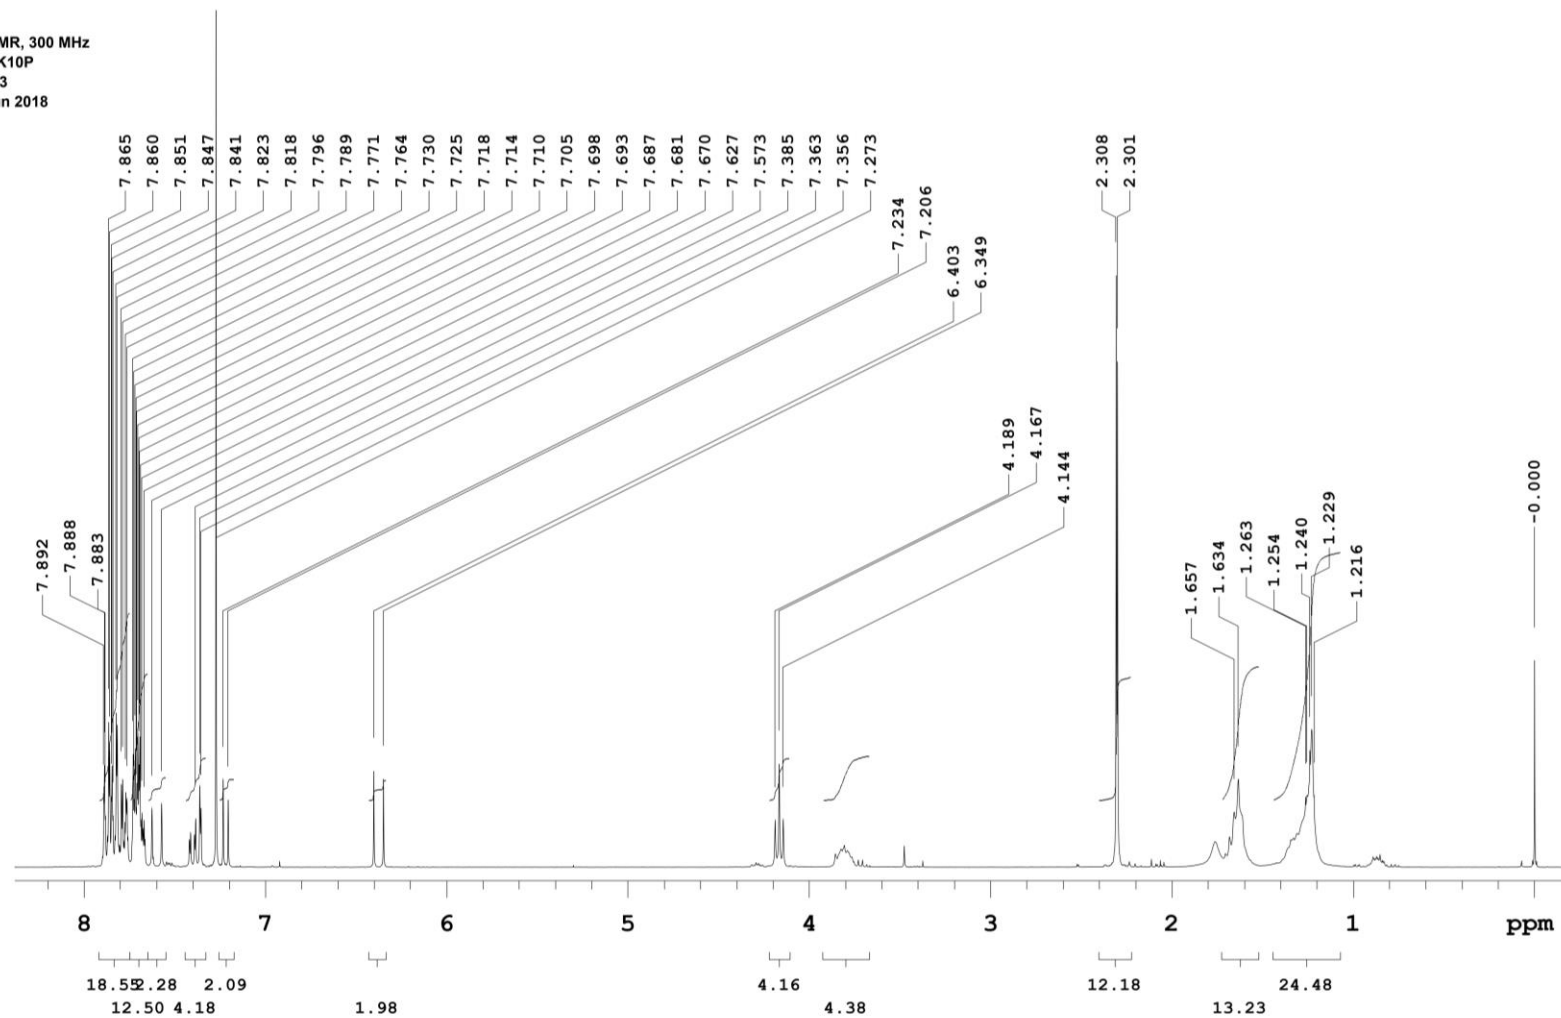

Figure S9. <sup>1</sup>H NMR data of CAP 10 (in CDCl<sub>3</sub>)

31P NMR, 121.47 MHz  
AVMK10P  
CDCl<sub>3</sub>  
25 Jun 2018

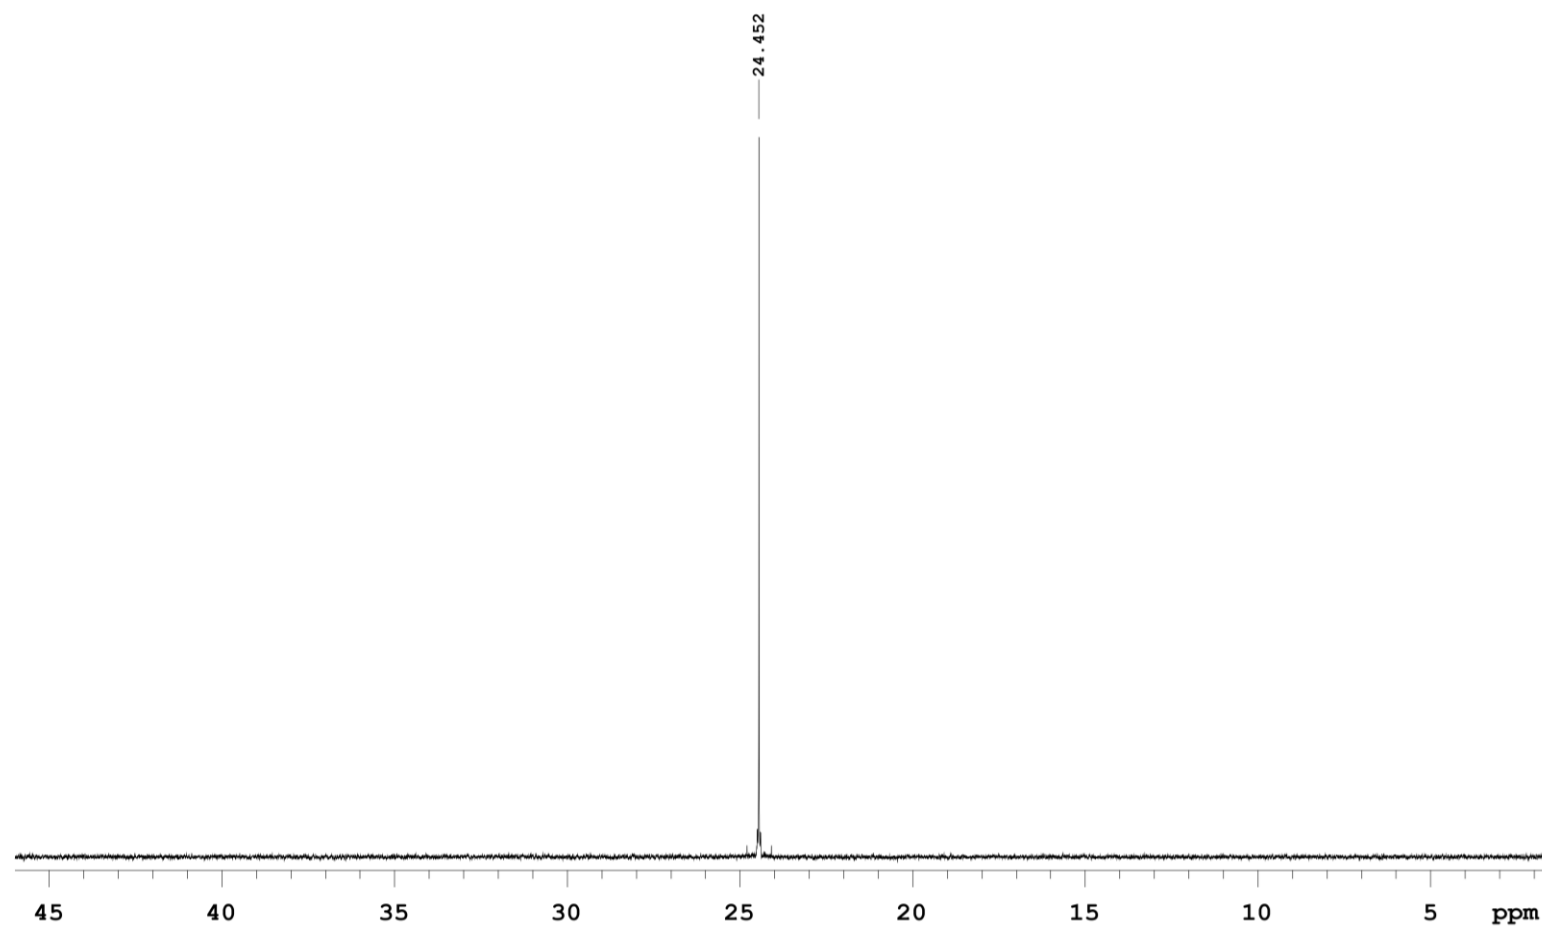

Figure S10. <sup>31</sup>P NMR data of CAP 10 (in CDCl<sub>3</sub>)

<sup>13</sup>C NMR, 100 MHz, AutoX\_DB  
AVMK-12TPP  
CDCl<sub>3</sub>  
01 Aug 2019

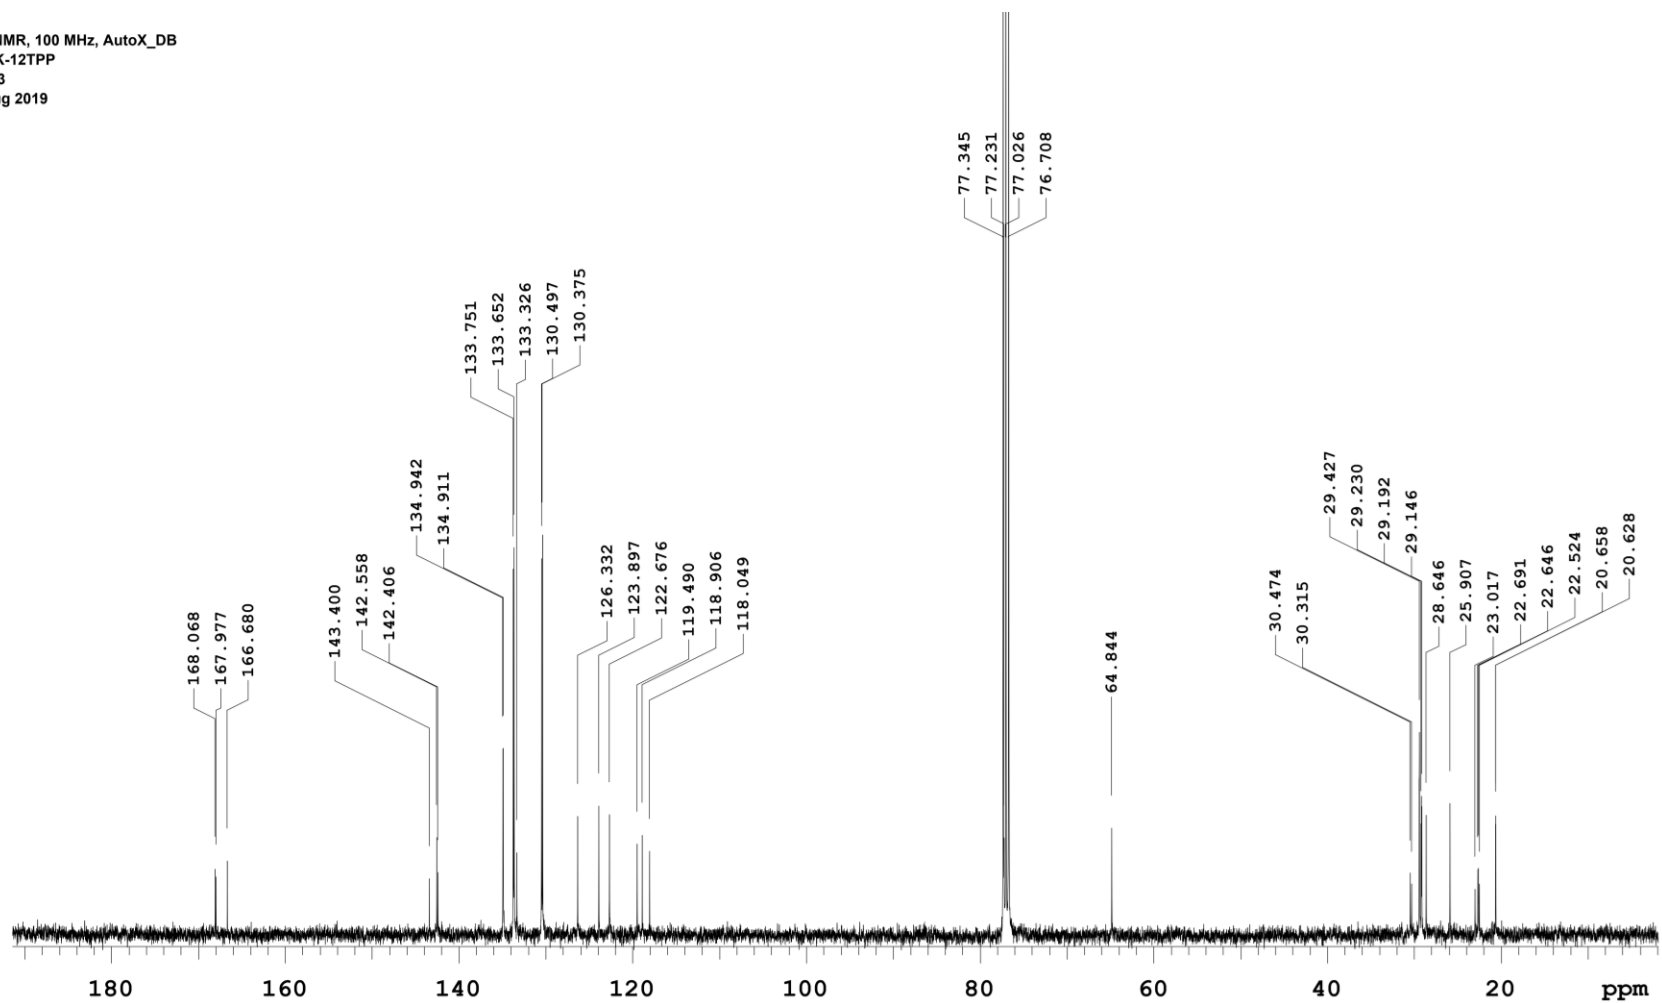

Figure S11. <sup>13</sup>C NMR data of CAP 12 (in CDCl<sub>3</sub>)

<sup>1</sup>H NMR, 400 MHz, AutoX\_DB  
AVMK-12TPP  
CDCl<sub>3</sub>  
01 Aug 2019

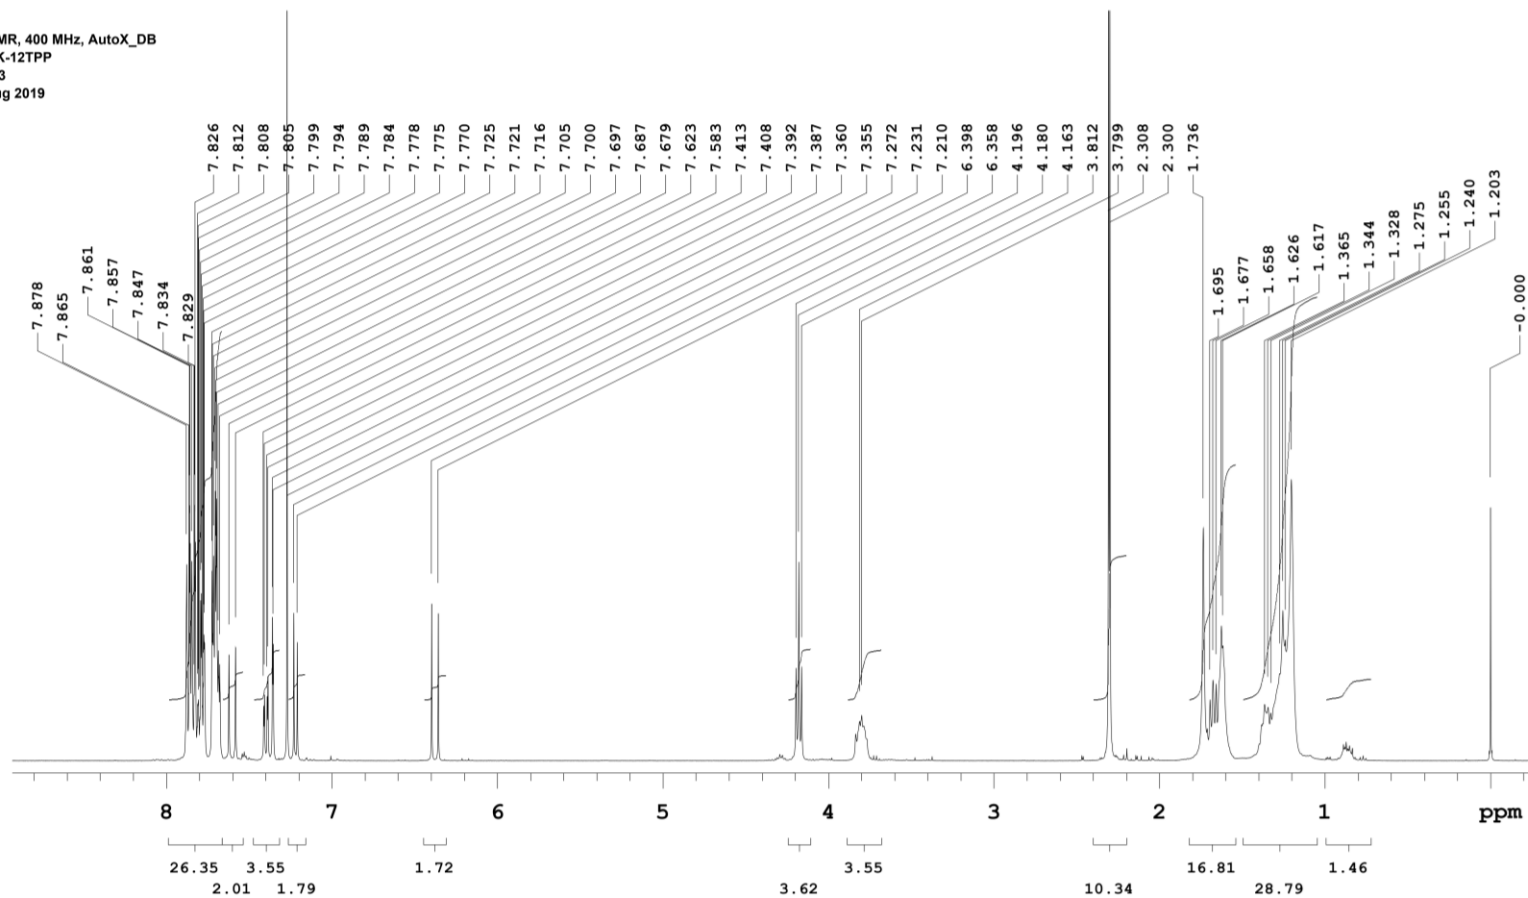

Figure S12. <sup>1</sup>H NMR data of CAP 12 (in CDCl<sub>3</sub>)

31P NMR, 162 MHz, AutoX\_DB  
AVMK-12TPP  
CDCl3  
01 Aug 2019

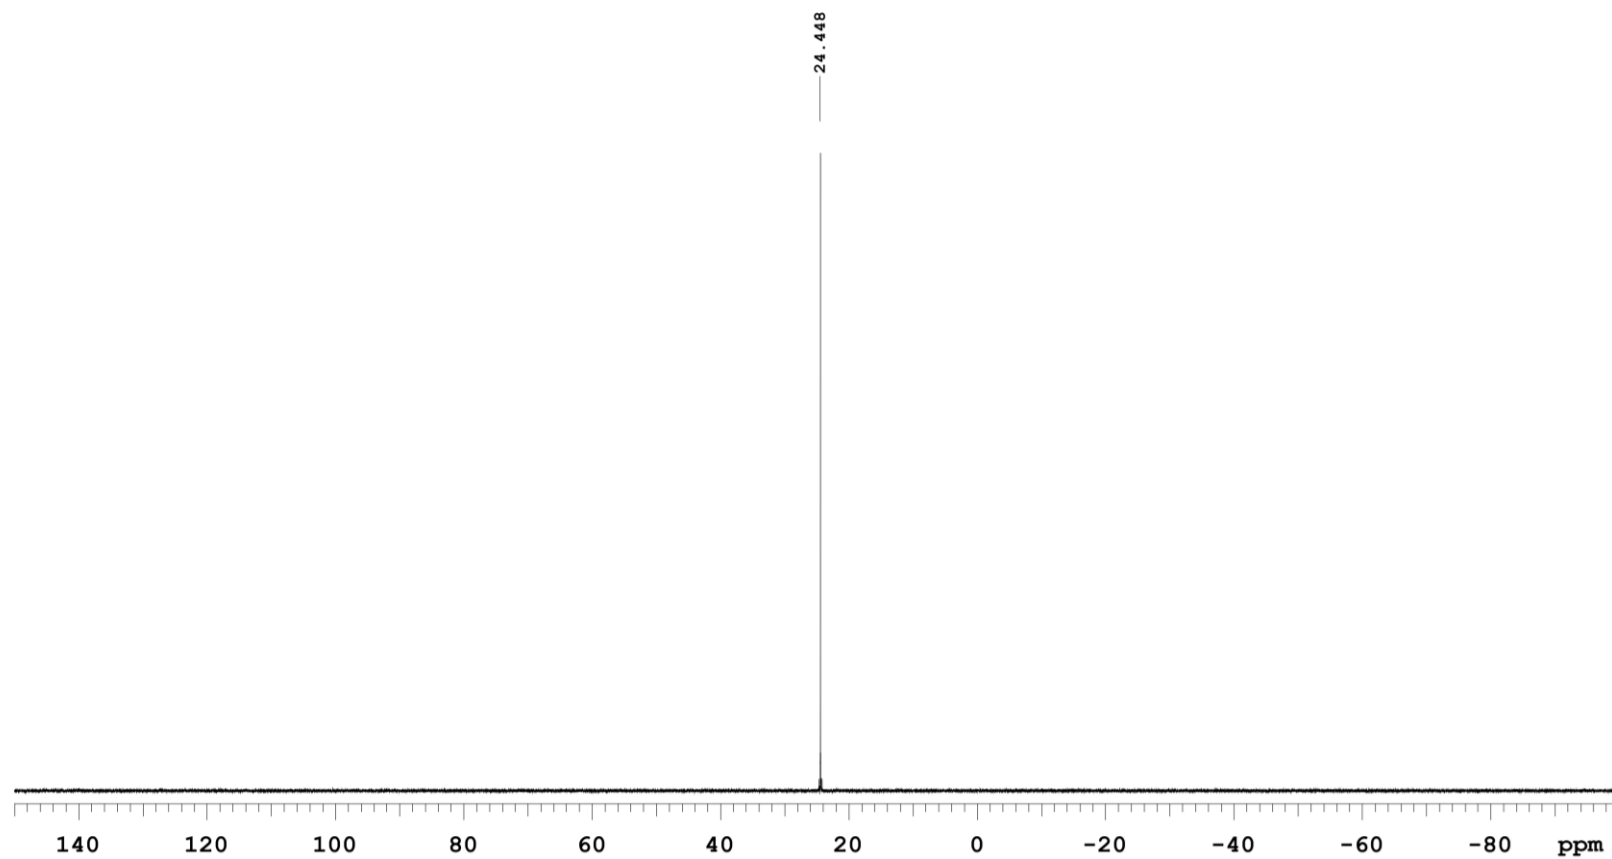

Figure S13. <sup>31</sup>P NMR data of CAP 12 (in CDCl<sub>3</sub>)

<sup>13</sup>C NMR, 75 MHz  
AVMK6A  
CDCl<sub>3</sub>  
19 Jun 2018

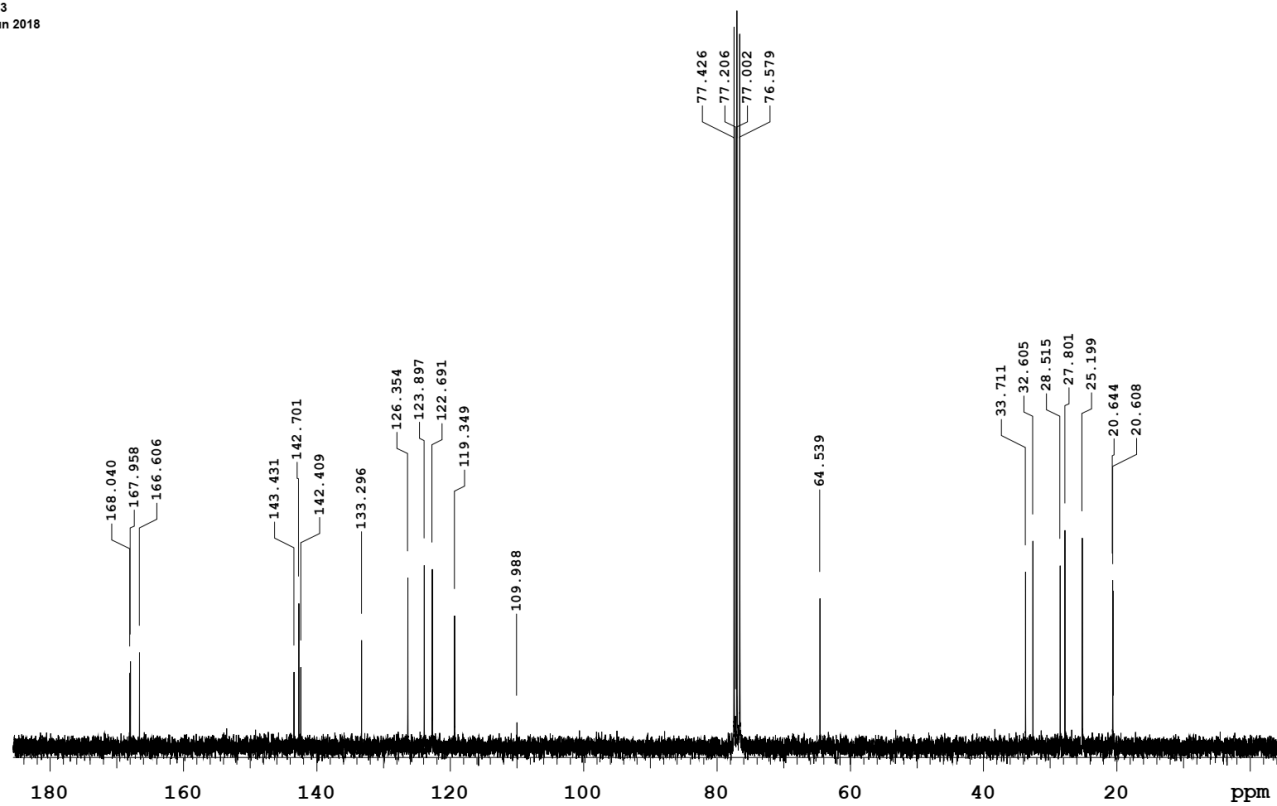

Figure S14. <sup>13</sup>C NMR data of CAP 6 ester (in CDCl<sub>3</sub>)



<sup>1</sup>H NMR, 300 MHz  
AVMK6A  
CDCl<sub>3</sub>  
19 Jun 2018

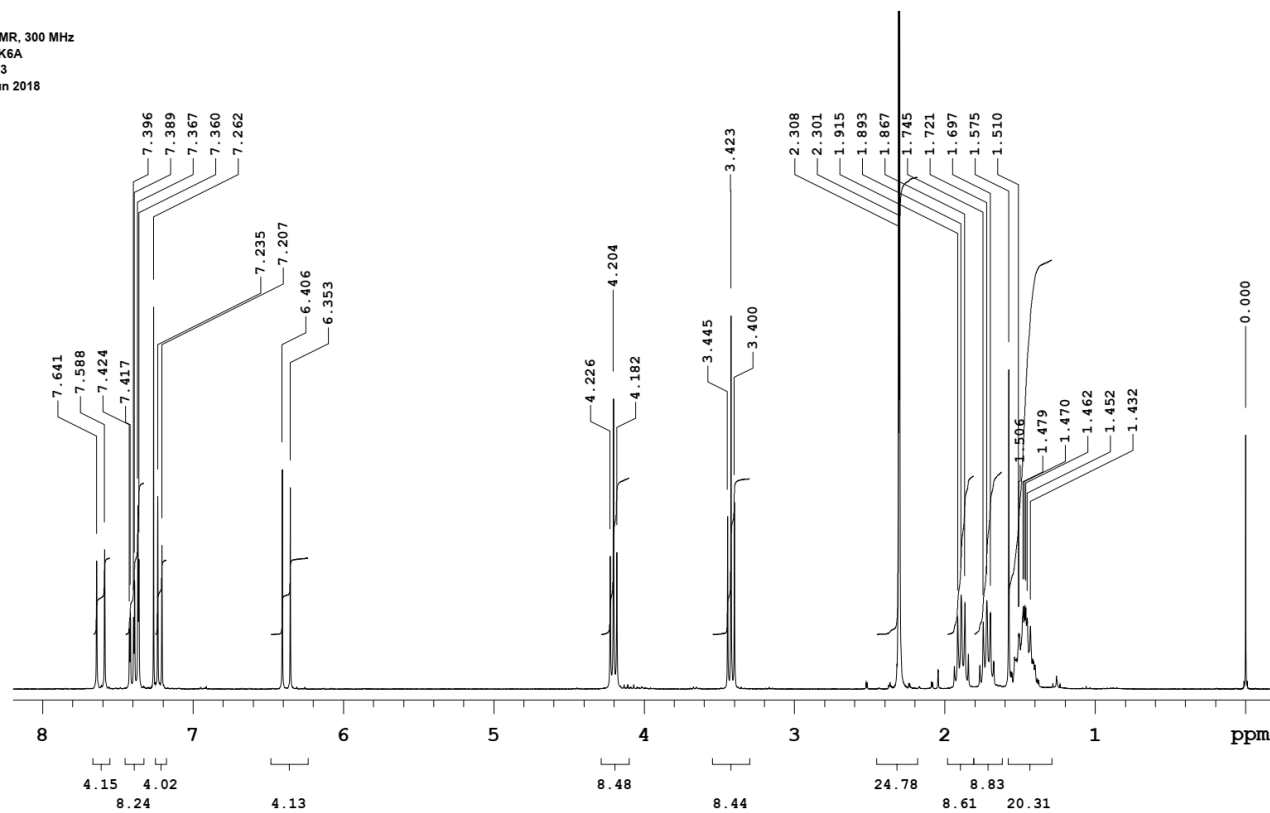

Figure S15. <sup>1</sup>H NMR data of CAP 6 ester (in CDCl<sub>3</sub>)

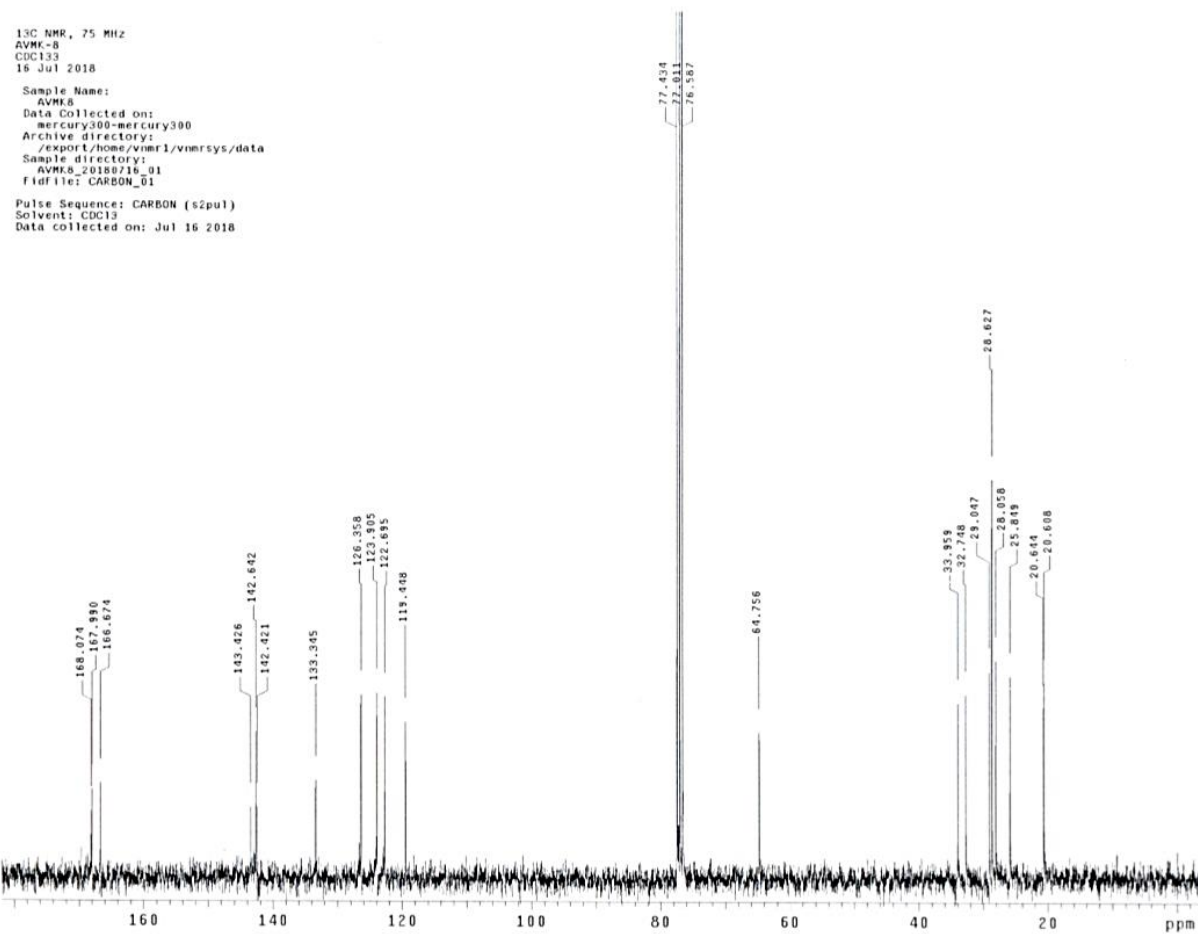

Figure S16. <sup>13</sup>C NMR data of CAP 8 ester (in CDCl<sub>3</sub>)

<sup>1</sup>H NMR, 300 MHz  
 AVMK-8  
 CDC133  
 16 Jul 2018  
 Sample Name:  
 AVMK8  
 Data Collected on:  
 mercury300-mercury300  
 Archive directory:  
 /export/home/vnmr1/vnmrsys/data  
 Sample directory:  
 AVMK8\_20180716\_01  
 FIDfile: PROTON\_01  
 Pulse Sequence: PROTON (s2pu1)  
 Solvent: CDCl3  
 Data collected on: Jul 16 2018

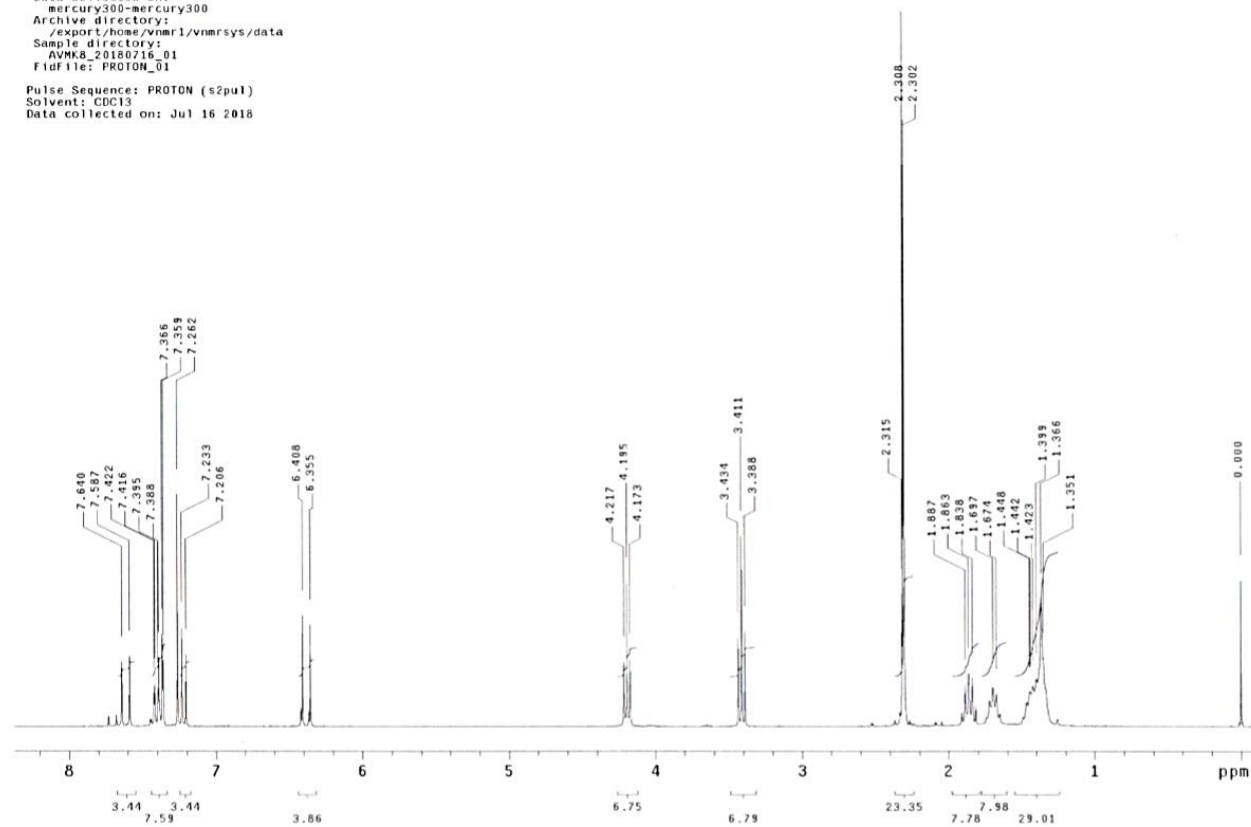

Figure S17. <sup>1</sup>H NMR data of CAP 8 ester (in CDCl<sub>3</sub>)

<sup>13</sup>C NMR, 75 MHz  
AVMK-10  
CDCl<sub>3</sub>  
11 Jun 2018

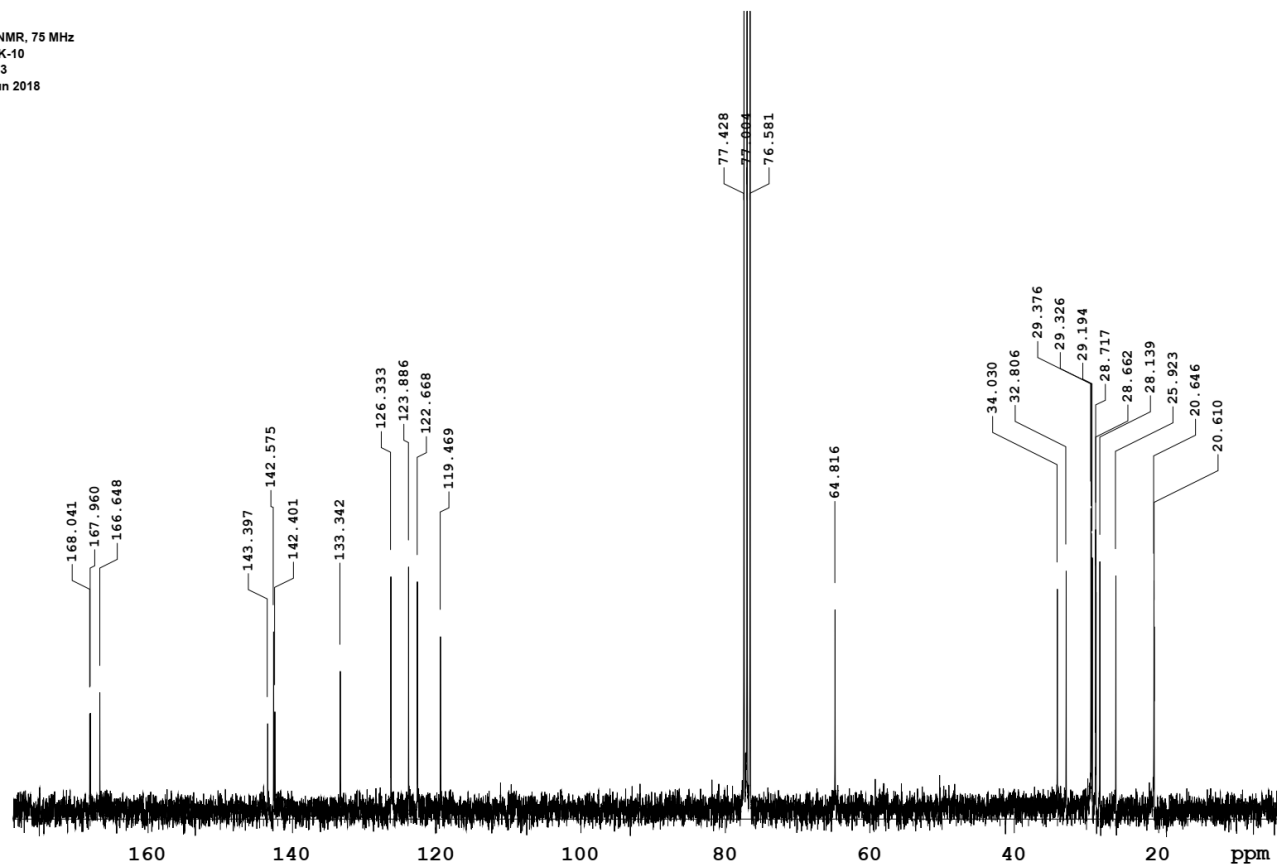

Figure S18. <sup>13</sup>C NMR data of CAP 10 ester (in CDCl<sub>3</sub>)

<sup>1</sup>H NMR, 300 MHz  
AVMK-10  
CDCl<sub>3</sub>  
11 Jun 2018

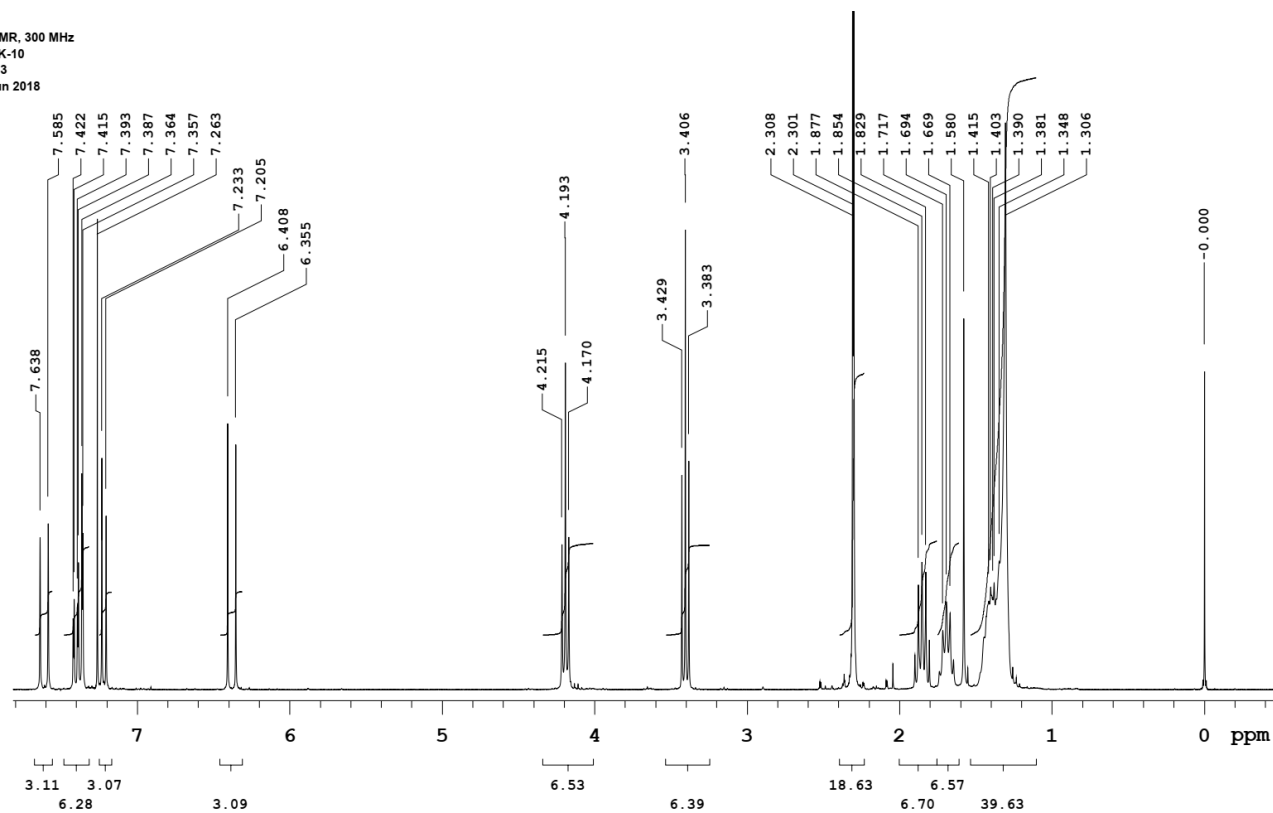

Figure S19. <sup>1</sup>H NMR data of CAP 10 ester (in CDCl<sub>3</sub>)

<sup>13</sup>C NMR, 75 MHz  
AVMK-12  
CDC13  
23 Jul 2018  
Sample Name:  
AVMK-12  
Data Collected on:  
mercury300-mercury300  
Archive directory:  
/export/home/vnmr1/vnmrsys/data  
Sample directory:  
AVMK-12\_20180723\_01  
Fidfile: CARBON  
Pulse Sequence: CARBON (s2pu1)  
Solvent: CDC13  
Data collected on: Jul 23 2018

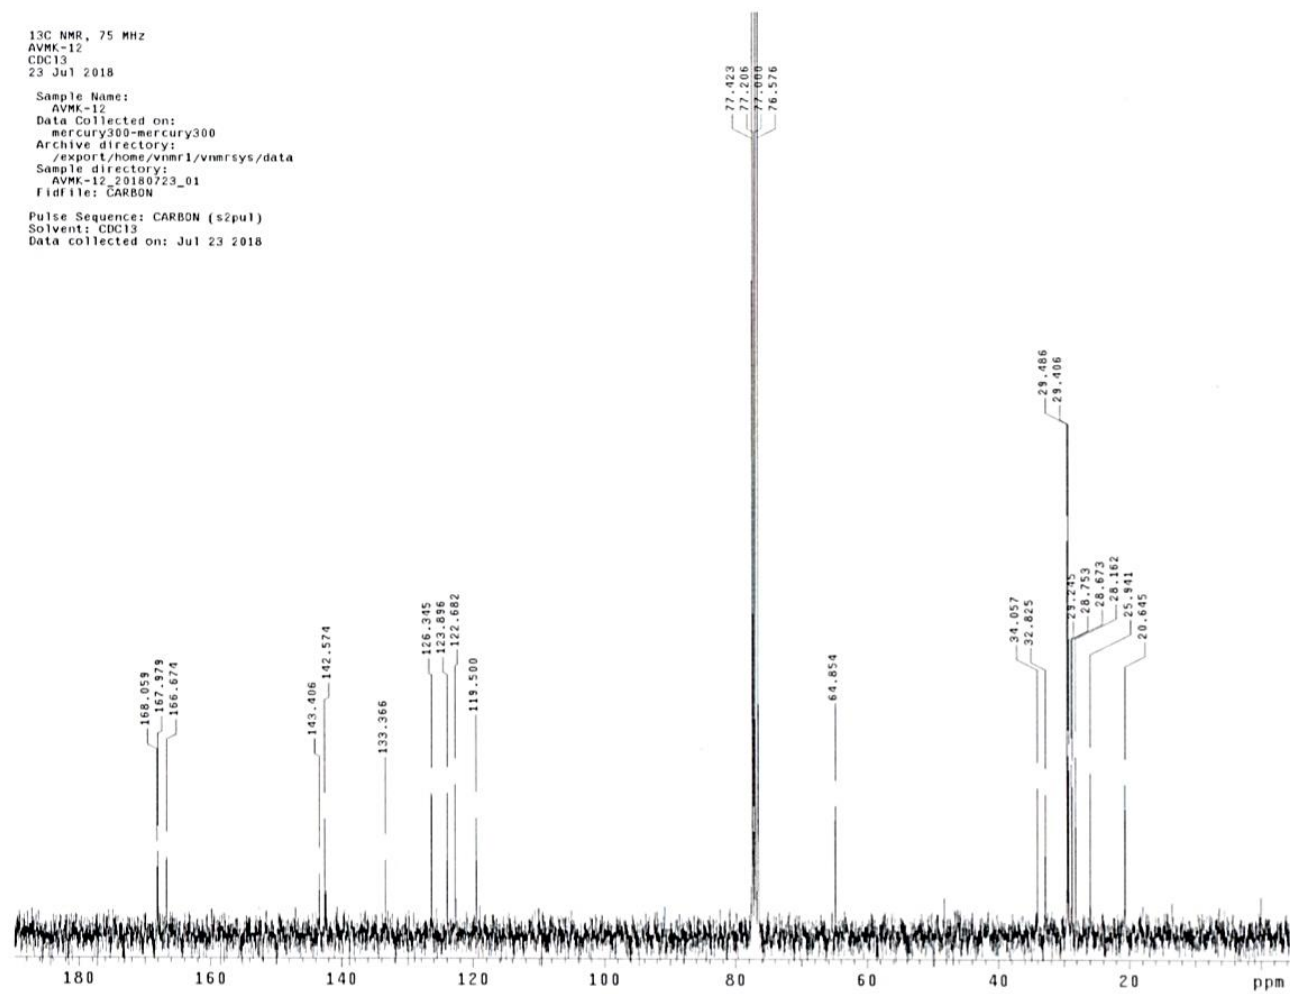

Figure S20. <sup>13</sup>C NMR data of CAP 12 ester (in CDCl<sub>3</sub>)

<sup>1</sup>H NMR, 300 MHz  
 AVMK-12  
 CDC13  
 23 Jul 2018  
 Sample Name:  
 AVMK-12  
 Data Collected on:  
 mercury300-mercury300  
 Archive directory:  
 /export/home/vnmr1/vnmrsys/data  
 Sample directory:  
 AVMK-12\_20180723\_01  
 FIDfile: PROTON\_01  
 Pulse Sequence: PROTON (s2pul)  
 Solvent: CDC13  
 Data collected on: Jul 23 2018

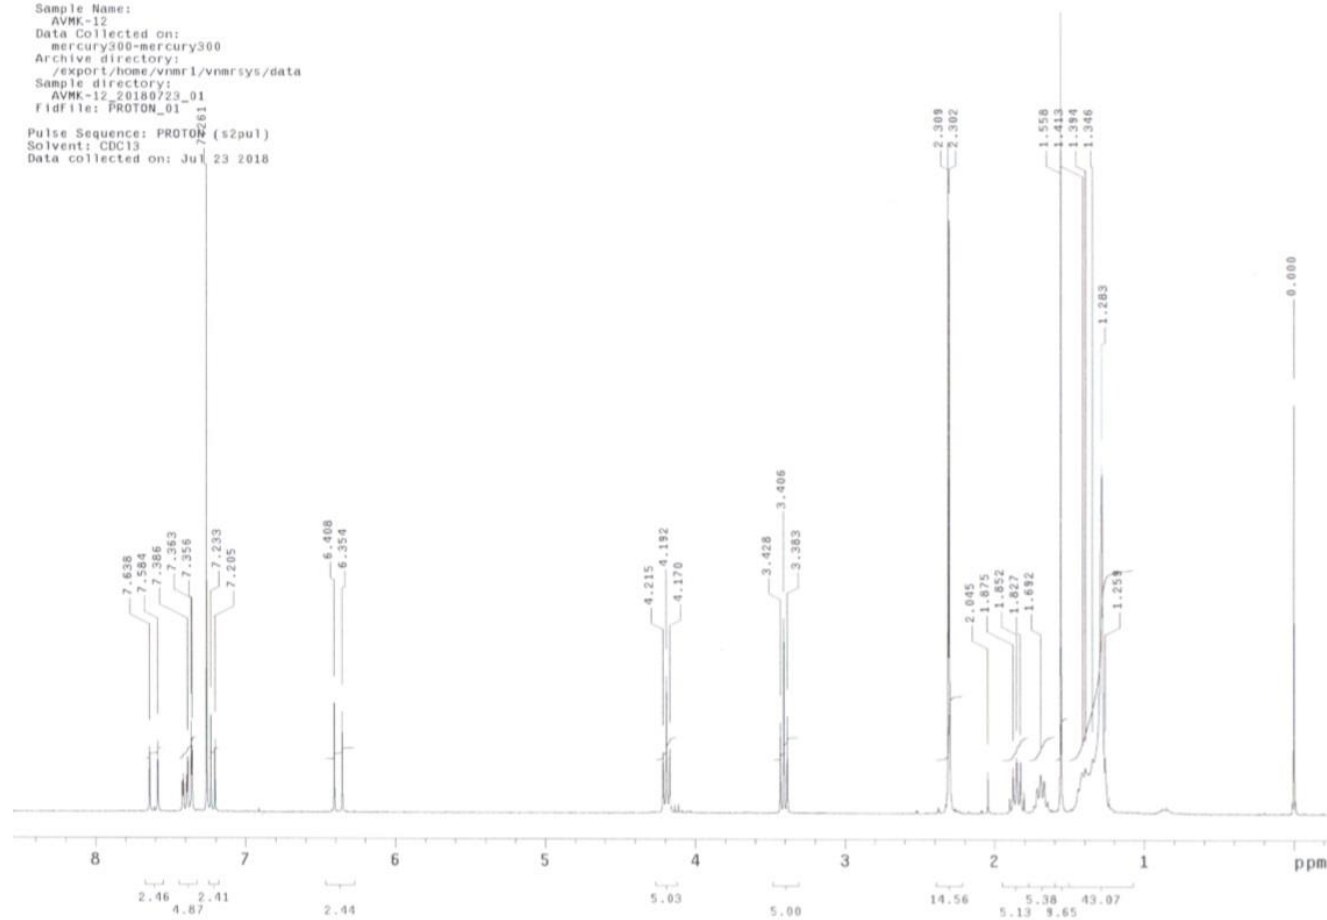

Figure S21. <sup>1</sup>H NMR data of CAP 12 ester (in CDCl<sub>3</sub>)

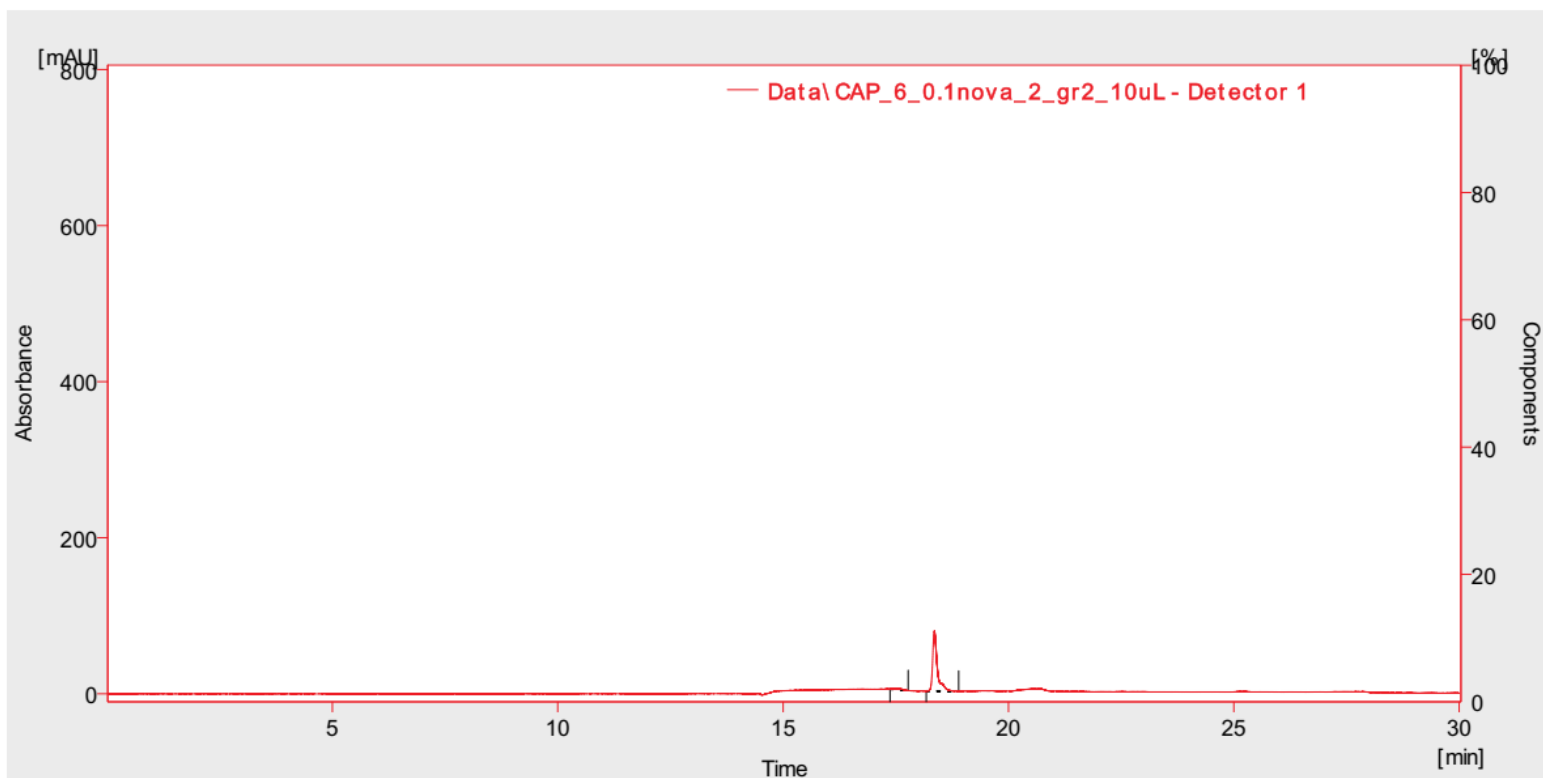

Result Table (Uncal - Data\CAP\_6\_0.1nova\_2\_gr2\_10uL - Detector 1)

|   | Reten. Time<br>[min] | Area<br>[mAU.s] | Height<br>[mAU] | Area<br>[%] | Height<br>[%] | W05<br>[min] | PDA Peak<br>Purity | Compound Name |
|---|----------------------|-----------------|-----------------|-------------|---------------|--------------|--------------------|---------------|
| 1 | 17,463               | 18,987          | 1,039           | 3,3         | 1,3           | 0,22         | 1000               |               |
| 2 | 18,357               | 554,007         | 77,056          | 96,7        | 98,7          | 0,09         | 988                |               |
|   | Total                | 572,994         | 78,096          | 100,0       | 100,0         |              |                    |               |

Figure S22. HPLC-DAD data of CAP 6 (60% H<sub>2</sub>O + 0.05% TFA/40% ACN + 0.05% TFA) at  $\lambda$  = 254 nm



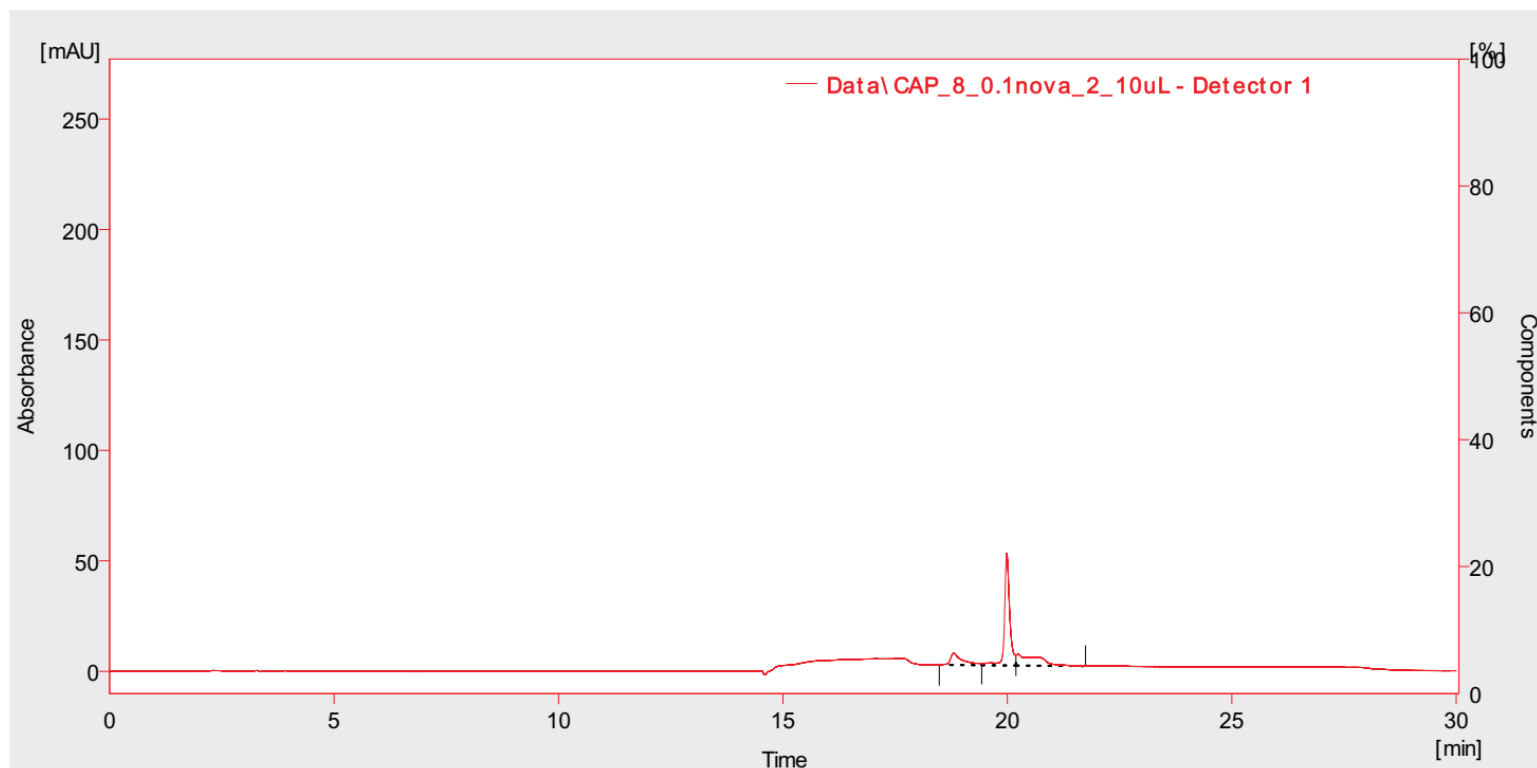

Result Table (Uncal - Data\CAP\_8\_0.1nova\_2\_10uL - Detector 1)

|   | Reten. Time<br>[min] | Area<br>[mAU.s] | Height<br>[mAU] | Area<br>[%] | Height<br>[%] | W05<br>[min] | PDA Peak<br>Purity | Compound Name |
|---|----------------------|-----------------|-----------------|-------------|---------------|--------------|--------------------|---------------|
| 1 | 18,804               | 102,112         | 5,413           | 14,7        | 8,8           | 0,22         | 990                |               |
| 2 | 19,989               | 415,533         | 50,786          | 59,9        | 82,8          | 0,11         | 986                |               |
| 3 | 20,237               | 176,178         | 5,120           | 25,4        | 8,4           | 0,65         | 995                |               |
|   | Total                | 693,824         | 61,320          | 100,0       | 100,0         |              |                    |               |

Figure S23. HPLC-DAD data of CAP 8 (60% H<sub>2</sub>O + 0.05% TFA/40% ACN + 0.05% TFA) at  $\lambda$  = 254 nm

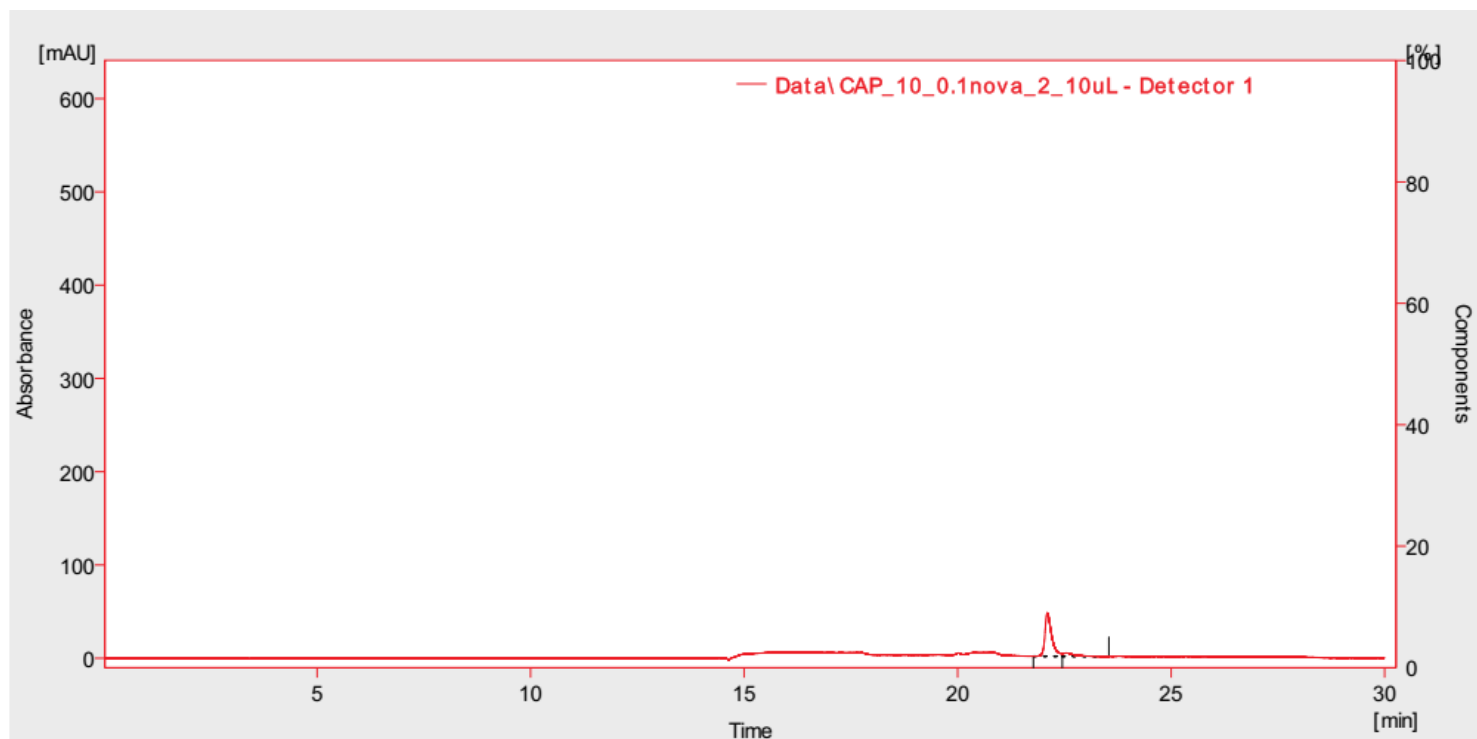

Result Table (Uncal - Data\CAP\_10\_0.1nova\_2\_10uL - Detector 1)

|   | Reten. Time<br>[min] | Area<br>[mAU.s] | Height<br>[mAU] | Area<br>[%] | Height<br>[%] | W05<br>[min] | PDA Peak<br>Purity | Compound Name |
|---|----------------------|-----------------|-----------------|-------------|---------------|--------------|--------------------|---------------|
| 1 | 22,105               | 514,811         | 46,736          | 88,3        | 92,8          | 0,15         | 984                |               |
| 2 | 22,561               | 68,292          | 3,617           | 11,7        | 7,2           | 0,25         | 997                |               |
|   | Total                | 583,103         | 50,353          | 100,0       | 100,0         |              |                    |               |

Figure S24. HPLC-DAD data of CAP 10 (60% H<sub>2</sub>O + 0.05% TFA/40% ACN + 0.05% TFA) at  $\lambda = 254$  nm

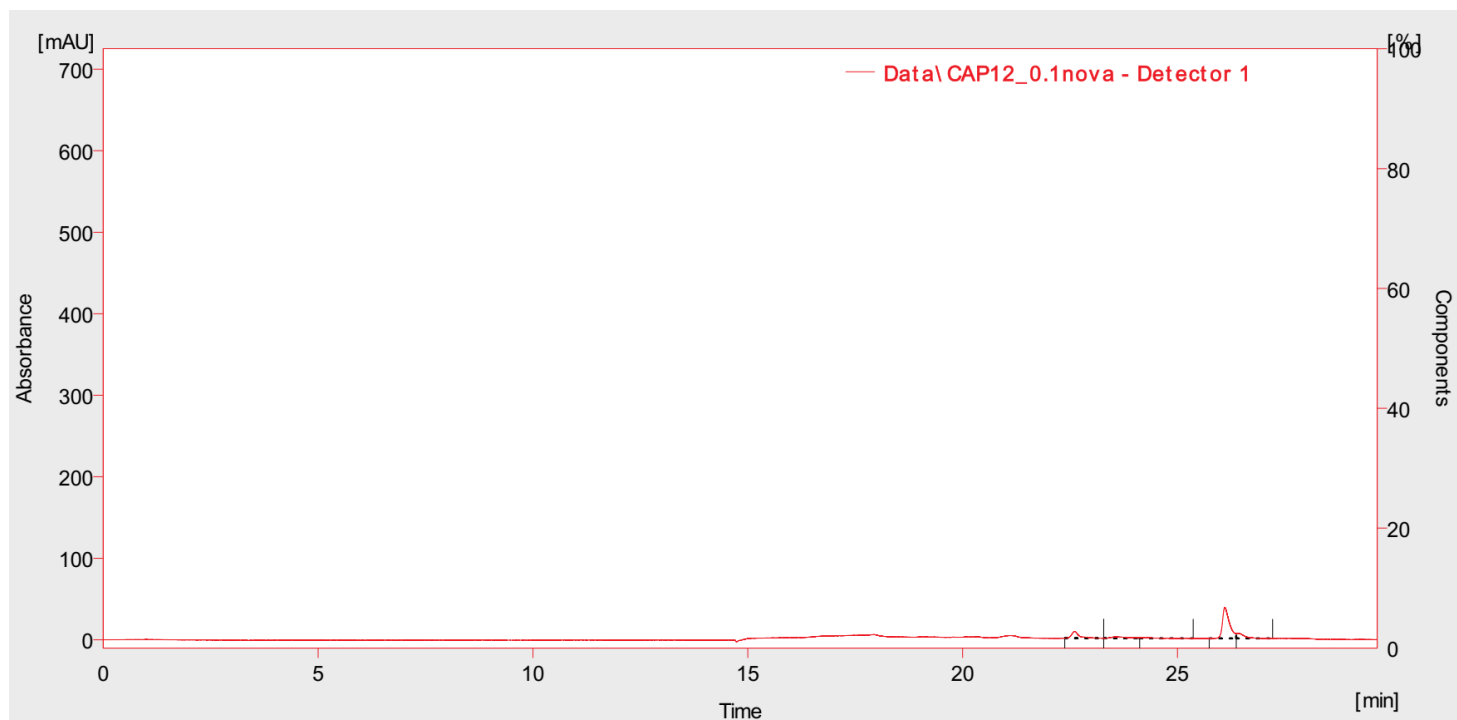

Result Table (Uncal - Data\CAP12\_0.1nova - Detector 1)

|   | Reten. Time<br>[min] | Area<br>[mAU.s] | Height<br>[mAU] | Area<br>[%] | Height<br>[%] | W05<br>[min] | PDA Peak<br>Purity | Compound Name |
|---|----------------------|-----------------|-----------------|-------------|---------------|--------------|--------------------|---------------|
| 1 | 22,604               | 102,228         | 8,380           | 14,9        | 15,1          | 0,15         | 987                |               |
| 2 | 23,583               | 48,823          | 1,725           | 7,1         | 3,1           | 0,44         | 998                |               |
| 3 | 24,273               | 21,812          | 0,918           | 3,2         | 1,7           | 0,26         | 999                |               |
| 4 | 26,100               | 431,825         | 38,151          | 62,8        | 68,8          | 0,16         | 993                |               |
| 5 | 26,429               | 83,343          | 6,269           | 12,1        | 11,3          | 0,18         | 991                |               |
|   | Total                | 688,031         | 55,444          | 100,0       | 100,0         |              |                    |               |

Figure S25. HPLC-DAD data of CAP 12 (60% H<sub>2</sub>O + 0.05% TFA/40% ACN + 0.05% TFA) at  $\lambda$  = 254 nm
